# Supplementary material for: Integration of pan-cancer transcriptomics with RPPA proteomics reveals mechanisms of epithelial-mesenchymal transition
Source: PLoS Comput Biol. 2018 Jan 2;14(1):e1005911. doi: 10.1371/journal.pcbi.1005911 (PMC5766255; doi:10.1371/journal.pcbi.1005911)
Supplement: S2 Table — (XLSX) [file pcbi.1005911.s007.xlsx]

## Sheet: Sheet 1
Supporting Table 2
gene_symbol	bimodal_cor
CDH1	0.815899
F11R	0.740056
ESRP2	0.738174
EPCAM	0.733014
CLDN7	0.73216
MARVELD2	0.726802
MARVELD3	0.725292
MPZL2	0.717564
CRB3	0.71466
MAL2	0.713869
CDS1	0.712478
LLGL2	0.711849
SPINT1	0.711246
DSP	0.70918
FAM83H	0.709027
ELF3	0.708193
SPINT2	0.707394
TMC4	0.706065
PPL	0.702484
SCNN1A	0.701935
LAD1	0.700677
LSR	0.698902
TC2N	0.697035
MAP7	0.69532
C1orf172	0.691464
IRF6	0.689171
STARD10	0.688183
ESRP1	0.687888
PRSS22	0.685079
CDH3	0.685055
S100A14	0.6817
EPN3	0.679625
CHMP4C	0.676687
GRHL2	0.675883
KRT19	0.673679
KIAA1522	0.673385
TMEM125	0.673351
PRSS8	0.671088
EXPH5	0.670454
C1orf210	0.670063
CLDN4	0.669986
JUP	0.66878
C19orf21	0.663995
OVOL2	0.6628
INADL	0.6586
C6orf132	0.658289
CNKSR1	0.657903
RBM47	0.657085
EPHA1	0.656416
DSC2	0.656382
PKP3	0.655052
TMEM30B	0.654536
CGN	0.653699
C1orf116	0.653517
GALNT3	0.651846
ARHGEF16	0.648471
DDR1	0.6479
TSPAN15	0.64615
RHOD	0.645397
MST1R	0.64494
GRTP1	0.644475
KLF5	0.642668
ARHGEF5	0.641004
EPS8L1	0.640866
SFN	0.638453
CCDC64B	0.63708
SH2D3A	0.635507
TSPAN1	0.634076
CXCL16	0.633699
TJP3	0.633435
CBLC	0.632895
B3GNT3	0.63241
TMEM184A	0.630736
GRHL1	0.628721
RAB25	0.628507
PRRG2	0.627456
MYH14	0.627141
TACSTD2	0.62657
MYO6	0.626251
OVOL1	0.625525
MYO5C	0.624698
LRRC1	0.624398
FLJ23867	0.624006
SLC44A3	0.622232
BSPRY	0.621194
EFNA1	0.619071
GRB7	0.618465
EVPL	0.616464
GOLT1A	0.61641
FA2H	0.61614
ST14	0.614283
SSH3	0.614097
BAIAP2L1	0.61197
ERBB3	0.610859
ATP2C2	0.607928
CMTM4	0.605789
MYO5B	0.605582
ADAP1	0.605311
PLEKHG6	0.604697
DSG2	0.604375
HOOK2	0.602469
LIPH	0.598146
VWA1	0.597981
SH3YL1	0.597082
ZNF165	0.596428
AP1M2	0.593869
CLDN3	0.593472
PERP	0.593292
ELMO3	0.589074
SHROOM3	0.588173
STAP2	0.588005
PRR15	0.586374
PLS1	0.585839
SLC52A3	0.585713
ANXA9	0.583102
AGR2	0.579433
KRT7	0.577653
RAB17	0.577565
PRRG4	0.577139
RASEF	0.574806
MAPK13	0.574552
C19orf46	0.573717
ITGB4	0.572392
FAM110C	0.571999
FGFBP1	0.571654
CYB561	0.571205
FOXA1	0.570995
EPS8L2	0.57069
GJB3	0.570344
PVRL4	0.568265
LOC100505880	0.567343
ANKRD22	0.567131
SERINC2	0.566956
EPB41L4B	0.566411
FAM83B	0.565843
RHPN2	0.564178
P2RY2	0.564159
TNK1	0.560144
ITGB6	0.559242
S100P	0.558778
ANXA3	0.557552
SERPINB5	0.557332
MANSC1	0.557102
ERBB2	0.556771
PAK6	0.556326
TMEM45B	0.55452
ENPP5	0.553775
CD46	0.552577
CAMSAP3	0.551601
KIAA1671	0.549987
TMPRSS4	0.549937
ARRDC1	0.548863
COBL	0.548647
TPD52L1	0.548328
EHF	0.54766
STYK1	0.547065
LAMA5	0.545857
PRR15L	0.54556
TMC5	0.545451
KCNK1	0.544989
FUT1	0.544932
SLPI	0.544286
MUC1	0.543831
LYPD3	0.543143
C2orf55	0.542789
ATP8B1	0.541907
GRHL3	0.539493
ALS2CL	0.539483
LOC440335	0.538511
KLC3	0.538293
FXYD3	0.537156
SDC4	0.536632
TMEM54	0.535582
TTC39A	0.535128
STX19	0.534578
EPB41L1	0.533986
PLEKHG3	0.533569
PTPN3	0.533349
PLEKHA6	0.531318
RAB20	0.531295
PROM2	0.530994
RNF39	0.530599
F2RL1	0.52996
KRTCAP3	0.525936
SMPDL3B	0.525224
STEAP4	0.524119
PLEKHA7	0.52372
GSTO2	0.522166
HDHD3	0.521449
MPP7	0.520757
C19orf33	0.520227
WWC1	0.518467
VGLL1	0.518049
PPP1R13L	0.517159
SCEL	0.513049
C2orf15	0.512964
SLC12A8	0.512154
USP43	0.510691
IGSF9	0.508359
AIM1L	0.507957
LAMC2	0.507826
ITPKC	0.507718
PWWP2B	0.507352
GPR56	0.506298
FRK	0.505685
FAM83F	0.505367
CNNM4	0.504484
GPR110	0.503487
PPAP2C	0.501589
TINAGL1	0.501502
S100A16	0.501376
SULT2B1	0.500733
LCN2	0.500662
PRKCZ	0.500656
FHDC1	0.500447
RECK	-0.504904
LOC100506844	-0.507301
CEP85L	-0.508396
FAM216A	-0.509181
PDXP	-0.510901
FAM55C	-0.523932
SEPT6	-0.524375
ANKRD44	-0.528286
TCF4	-0.530685
LOC100129195	-0.530903
IFFO1	-0.533365
SACS	-0.53444
CCDC88A	-0.5347
WIPF1	-0.541273
ST3GAL2	-0.544041
LOC100505481	-0.544989
SH2B3	-0.551236
SLC35B4	-0.558892
FBXO43	-0.55935
AP1S2	-0.561823
ZEB2	-0.578703
STARD9	-0.579134
AP1M1	-0.586
ZEB1	-0.662734
