# Supplementary material for: Integration of pan-cancer transcriptomics with RPPA proteomics reveals mechanisms of epithelial-mesenchymal transition
Source: PLoS Comput Biol. 2018 Jan 2;14(1):e1005911. doi: 10.1371/journal.pcbi.1005911 (PMC5766255; doi:10.1371/journal.pcbi.1005911)
Supplement: S3 Table — (CSV) [file pcbi.1005911.s008.csv]

from	to	causal_weight	bimodal_cor
EPHA2_pT594	NRAS	0.865	0.127283523335656
EGFR_pY1068	HER2_pY1248	0.85	0.813383641990024
MYOSINIIA	ACETYLATUBULINLYS40	0.805	0.632082108365964
GSK3_pS9	GSK3ALPHABETA_pS21S9	0.78	0.244419784188226
EPHA2_pT594	CD31	0.75	0.848028406708137
MYOSINIIA	AXL	0.745	0.588816738816739
PKCPANBETAII_pS660	PKCDELTA_pS664	0.74	0.567787451187679
MRE11	ACVRL1	0.74	0.414234913608437
EEF2	FLT3FLK2	0.7	0.5016581537981
E2F1	CK5	0.69	0.0762131340178382
CYCLINA	BRN2	0.67	0.388413506012951
MRE11	CHK1_pS296	0.66	0.481777839113404
EPHA2_pT594	ERCC1	0.655	0.768352356474142
AKT_pT308	AKT_pS473	0.645	0.844903841572384
KRAS	STAT5ALPHA	0.63	0.314285714285714
CLAUDIN7	MACC1	0.63	0.594059062626418
CASPASE3	GPBB	0.625	-0.41941256324818
CASPASE3	BCATENIN_pT41S45	0.615	0.430260630802559
CD274	PDL1	0.6	0.954802910174693
CYCLINA	CYTOKERATIN17	0.6	0.384944495837188
CHROMOGRANINANTERM	EZH2	0.585	0.360576756371482
S6_pS235S236	S6_pS240S244	0.58	0.940455543442186
GCN5L2	EPPK1	0.58	0.132178932178932
GCN5L2	CYCLINE2	0.575	0.286363636363636
ID2	CD38	0.575	0.692753623188406
SLC1A5	TSC1	0.565	0.0294837722584509
GYS_pS641	GYS	0.565	0.648380677558857
MRE11	DIRAS3	0.56	0.259581791947298
THYMIDILATESYNTHASE	TTF1	0.555	-0.259122344011866
BLNK_pY84	BLNK	0.555	0.683872957138452
CYTOKERATIN8	VEGFR2	0.545	0.699699352451434
PKCALPHA	PKCALPHA_pS657	0.53	0.949118806581775
SMAD6	BLNK_pY96	0.53	0.408742252003617
CASPASE3	NOTCH3	0.525	-0.0458472170800938
UGT1A	SOD2	0.525	0.552943354313217
RAD50	FLT3FLK2	0.52	0.400659307757407
CYTOKERATIN19	FOXO3A	0.51	0.537704007222724
RET_pY905	SHC_pY317	0.51	0.511499018993103
CYCLINE2	TTF1	0.51	0.19239082275433
TFRC	MRE11	0.505	-0.467962830052975
HEREGULIN	KEAP1	0.5	0.31356856618474
SYK_pY323	SMAD6	0.5	0.788960838729571
TAZ_pS79	PRAS40_pT246	0.495	-0.48277058279371
X4EBP1_pT37T46	X4EBP1_pS65	0.49	0.246948607396912
BCL2	PUMA	0.49	0.40580649142293
ELK1_pS383	X53BP1	0.485	0.205973096384055
MYOSINIIA	CYCLINE1	0.485	-0.34011544011544
SLC1A5	RBM15	0.485	0.566883116883117
EPHA2_pT594	ACVRL1	0.485	0.235027006005052
ATR	ATR_pS428	0.485	-0.0179876394622093
CRM1	SNF5	0.485	0.0982576310748427
AURORAB	CHK1	0.48	0.480279037429085
CASPASE3CLEAVED	PI3KP110ALPHA	0.48	0.728723404255319
CLAUDIN7	RAB25	0.48	0.692703066474224
X4EBP1_pS65	X4EBP1_pT37T46	0.475	0.246948607396912
RPA32	CHK1_pS345	0.475	0.274825960059785
P38	P38ALPHA	0.475	0.258919211437828
PKCALPHA_pS657	PKCALPHA	0.47	0.949118806581775
KRAS	MAPK_pT202Y204	0.465	0.771428571428571
RICTOR_pT1135	P70S6K_pT389	0.465	0.559669393999015
PEA15_pS116	NDUFB4	0.465	0.0656662825069643
LCK	BCL6	0.465	0.600986767042656
EGR2	BCRYSTALLIN	0.46	0.633720164084655
TAU	P90RSK_pT359S363	0.455	0.295906732769877
MRE11	SETD2	0.455	0.30955375352952
TAZ_pS79	HER3_pY1289	0.45	-0.366674375578168
CRM1	ATR_pS428	0.445	-0.155415728172404
ATR_pS428	ATR	0.44	-0.0179876394622093
CASPASE3CLEAVED	X4EBP1	0.435	0.344935245143386
RPA32	GSK3ALPHABETA	0.435	0.243077506555459
CMET_pY1235	RET_pY905	0.435	0.25565692033335
CHK1_pS296	P27_pT157	0.43	-0.190654160926408
FLT3FLK2	RAD50	0.43	0.400659307757407
G6PD	PDCD1	0.43	0.226530022538576
CD55	LAT	0.43	0.541535615171138
CASPASE3	P27_pT157	0.425	-0.162340123459169
HEREGULIN	P63	0.425	0.287067426493179
LCK	STAT6_pY641	0.425	0.189167839307264
CD20	CMYC_pT58S62	0.425	-0.298920752389763
CASPASE3	GYS	0.42	-0.0729359496482784
CRM1	HER3	0.415	-0.108844367533793
S6_pS240S244	S6_pS235S236	0.415	0.940455543442186
HISTONEH3	XBP1	0.415	-0.156670368999136
CMET_pY1235	MACC1	0.415	0.288566970391632
SLC1A5	PTEN	0.41	-0.396031746031746
LAT_pY191	SRC	0.41	-0.690874464742909
CYTOKERATIN8	BAD_pS112	0.41	-0.380666049953747
SLC1A5	MYOSINIIA_pS1943	0.41	0.286291486291486
PDL1	CD274	0.41	0.954802910174693
CHROMOGRANINANTERM	E2F1	0.41	0.189900021190114
HEREGULIN	CK5	0.41	0.399675598464533
SLC1A5	CYCLIND1	0.405	-0.277849927849928
EGFR_pY1068	SHC_pY317	0.405	0.621381998576892
TAZ_pS79	ARAF_pS299	0.405	-0.610484119642306
CASPASE3CLEAVED	PARPCLEAVED	0.405	0.237280296022202
ALPHACATENIN	ECADHERIN	0.4	0.733766233766234
P70S6K_pT389	RICTOR_pT1135	0.4	0.559669393999015
MRE11	TFRC	0.4	-0.467962830052975
CD26	GLUTAMINASE	0.4	0.499352091817845
CD20	DNMT3A	0.4	0.241689793401172
TELOMERASE	SPIB	0.4	-0.15695343817453
HISTONEH3_pS10	SYK_pY525Y526	0.4	0.700524205982115
RPA32	STATHMIN	0.395	0.250932794020447
GATA6	JAB1	0.395	0.292084554886561
INPP4B	LCN2A	0.39	0.493434191902637
LCK	CXCR4	0.39	0.637973590028384
X1433BETA	FLT3FLK2	0.39	0.459410824259627
CD20	JUNB	0.385	0.197779833487512
TELOMERASE	NEUROPILIN1	0.385	-0.574221399938329
COUPTFII	PKCALPHA_pS657	0.38	0.46482784154017
G6PD	KEAP1	0.38	-0.301107665042091
CYCLINB1	PLK1	0.38	0.768330722119356
CHK2_pT68	H2AX_pS139	0.38	0.202553216114429
ALPHACATENIN	NOTCH1	0.375	0.428571428571429
MRE11	EIF4G	0.375	-0.24817923428294
PLK1	FOXM1	0.375	0.572010366530914
CYTOKERATIN19	SCD	0.375	-0.0664568678267308
SNAIL	LCN2A	0.375	0.219453593387551
CJUN_pS73	MACC1	0.375	-0.308884436824565
CLAUDIN7	EIF2A_pS51	0.375	NA
GCN5L2	ASNS	0.37	0.187662337662338
CRM1	EGFR_pY1068	0.37	0.0186342609129004
KRAS	MEK1_pS217S221	0.37	0.371428571428571
CMYC_pT58	PDK1_pS241	0.37	-0.505522649206853
AKT_pT308	TUBERIN_pT1462	0.37	0.503832422728907
P62LCKLIGAND	NRF2	0.37	0.128011404133999
CASPASE3	MYOSIN11	0.37	-0.169381710477601
LAT	CD55	0.37	0.541535615171138
SYNAPTOPHYSIN	BAK	0.365	0.280508948007166
PI3KP110B	EIF4G	0.365	-0.171171171171171
TTF1	AXL	0.365	-0.21207836489376
DIRAS3	GATA6	0.365	0.18874120739892
HISTONEH2AX_pS139	CASPASE9CLEAVED	0.365	-0.390810977489978
CASPASE3	COXIV	0.365	0.0912316426015056
ERCC1	XPF	0.365	0.797112180673824
CYTOKERATIN18	SURVIVIN	0.365	0.427336590621173
CD20	LKB1_pS428	0.365	-0.101079247610237
CD20	COFILIN	0.365	0.276842429848905
CYTOKERATIN8	EGFR	0.36	0.62904717853839
HSP27_pS82	ANNEXIN1	0.36	0.682401579661854
THYMIDILATESYNTHASE	E2F1	0.36	0.0630328832039452
THYMIDILATESYNTHASE	EZH2	0.36	0.316545626167864
PEA15_pS116	DETYROSINATEDALPHATUBULIN	0.36	-0.584382327533012
IGF1R_pY1135Y1136	PDCD1L1	0.36	0.0416951469583048
CD38	ID2	0.36	0.692753623188406
SMAD6	SYK_pY323	0.36	0.788960838729571
SMAD1	CD11	0.36	-0.449275362318841
AKT_pS473	AKT_pT308	0.355	0.844903841572384
TAZ_pS79	AMPKALPHA	0.355	NA
CHK2	CHK2_pT68	0.355	0.213242160001477
KRAS	TIGAR	0.355	0.0857142857142857
DMHISTONEH3	ADAR1	0.355	0.443335611756664
CYCLIND1	LCN2A	0.355	-0.1873852301946
BETACATENIN	SMAD3_pS423	0.355	0.670328399629972
SRC_pY416	FAK_pY925	0.355	0.601850138760407
CMET_pY1235	EGFR_pY1173	0.35	0.328484830372192
MYOSINIIA	HSP70	0.35	-0.394588744588745
RPA32	RAD51	0.35	0.27886270500707
DMK9HISTONEH3	SMAD4	0.35	0.467943971368629
ELK1_pS383	ETS1	0.35	-0.0553807231889424
HSP27	SF2	0.35	0.235697661721829
X4EBP1_pT70	FAK	0.35	-0.573311748381129
BCL2A1	MIF	0.35	0.509337592056656
LAT_pY191	CKIT_pY703	0.35	0.880909820603561
ALPHATUBULIN	KI67	0.35	0.789142542167221
KRAS	AMPKALPHA	0.345	0.392792202424786
CHK2_pT68	CHK2	0.345	0.213242160001477
RET_pY905	EGFR_pY1068	0.345	0.585032637622698
SLC1A5	HSP70	0.345	-0.517027417027417
LDHA	GAPDH	0.345	0.399975317783537
GYS	GYS_pS641	0.345	0.648380677558857
CYCLINB1	AURORAB	0.345	0.4856590177445
SF2	HSP27	0.345	0.235697661721829
JAK2	IGFRB	0.345	-0.245156115019129
TELOMERASE	BETACATENIN_pS33S37T41	0.345	0.453715695343817
NFKBP65_pS536	ENOS_pS1177	0.345	0.700400863398088
TELOMERASE	PLK1_pT210	0.345	0.235436262445572
P38MAPK	JAK1	0.345	-0.255672141225713
KRAS	EEF2K	0.34	0.6
IGFBP5	IGFBP2	0.34	0.113206086252316
RICTOR_pT1135	MTOR_pS2448	0.34	0.425297665687697
H2AX_pS139	PAXILLIN	0.34	-0.534522325686009
PDCD1	G6PD	0.34	0.226530022538576
HEREGULIN	RET_pY905	0.34	-0.19253067031137
LCK	CKIT_pY703	0.34	0.687943262411347
SPIB	CULLIN2	0.34	0.271662041319766
CRM1	HER2	0.335	-0.128131536624145
KRAS	S6_pS235S236	0.335	-0.0857142857142857
SYNAPTOPHYSIN	CYCLINE2	0.335	0.321625474369594
ELK1_pS383	FASN	0.335	0.131895594224361
GCN5L2	PRDX1	0.335	-0.16998556998557
ELK1_pS383	RBM15	0.335	0.587652721214365
H2AX_pS139	TAZ	0.335	-0.524480080225436
THYMIDILATESYNTHASE	SNAIL	0.335	0.278231973955424
SLC1A5	BRD4	0.335	0.509235209235209
PEA15_pS116	MITOCHONDRIA	0.335	0.298130322102925
SYNAPTOPHYSIN	PARPAB3	0.335	0.157747679788971
EPPK1	P63	0.335	0.638242376374949
CRM1	JAGGED1	0.335	-0.103561252447626
P27_pT198	COFILIN_pS3	0.335	0.64716861082162
CYTOKERATIN19	CYCLINA	0.335	0.891766882516189
TELOMERASE	BLIMP1	0.335	0.720382362010484
BLNK_pY96	EGFR_pY992	0.335	-0.236090678515677
KRAS	AKT_pS473	0.33	-0.542857142857143
CASPASE3CLEAVED	BIM	0.33	0.2631822386679
RET_pY905	CMET_pY1235	0.33	0.25565692033335
H2AX_pS139	CHK2_pT68	0.33	0.202553216114429
SLC1A5	XRCC1	0.33	0.158802308802309
HISTONEH3	ARID1A	0.33	-0.436443292607676
ENY2	SMAC	0.33	0.122222222222222
CXCR4	P16INK4A	0.33	-0.593730717018388
BCL2A1	GYS	0.33	-0.169566827101074
BCRYSTALLIN	EGR2	0.33	0.633720164084655
LCK	DNMT1	0.33	0.673018809744064
SRC_pY416	SYK_pY352	0.33	0.173774952103627
SLC1A5	X1433EPSILON	0.325	-0.208730158730159
SNF5	ANNEXINVII	0.325	0.0592904913461793
P62LCKLIGAND	BRCA2	0.325	0.198811574839141
GCN5L2	COG3	0.325	-0.0544360684535146
GAPDH	PRAS40	0.325	0.180766382821177
TELOMERASE	EGR2	0.325	0.622757019468357
CD20	BLNK	0.325	0.187665741597286
CYTOKERATIN19	ACC1	0.32	0.057108132509202
EGFR_pY1173	CMET_pY1235	0.32	0.328484830372192
MACC1	INPP4B	0.32	0.543855830170869
PKCDELTA_pT507	PKCDELTA_pS664	0.32	0.688516505454504
MYOSINIIA	STATHMIN	0.32	-0.302525252525253
IGFBP5	TIGAR	0.32	-0.227272862784727
RPA32	CMET	0.32	0.206756893114371
E2F1	EZH2	0.32	0.119450598139123
FIBRONECTIN	CONNEXIN43	0.32	0.517832901394545
IGF1R_pY1135Y1136	PI3KP110B	0.32	0.084906824632852
CD20	VASP	0.32	0.397964847363552
CD20	ZNF342	0.32	-0.159296947271045
CYTOKERATIN8	ECADHERIN	0.315	0.636679000925069
FRA1	PAI1	0.315	0.693446871529063
BLNK	BLNK_pY84	0.315	0.683872957138452
CD20	CLIP115	0.315	0.0151094665433241
CD20	LAT	0.315	0.136355226641998
CD20	GAB2_pY452	0.315	NA
KRAS	ACC_pS79	0.31	0.314285714285714
CMYC_pT58	GSK3ALPHABETA_pS21S9	0.31	-0.482434599855018
BLIMP1	P38MAPK	0.31	-0.327906259636139
HSP27	SCD	0.31	-0.431964162275668
ALPHACATENIN	TIGAR	0.31	0.542857142857143
HEREGULIN	EZH2	0.31	0.163754389124862
E2F1	THYMIDILATESYNTHASE	0.31	0.0630328832039452
BCL2A1	CYCLOPHILINF	0.31	0.227944700057325
FLT3FLK2	NCADHERIN	0.305	0.479849562956559
PAX2	NCADHERIN	0.305	0.290471785383904
CJUN_pS73	P63	0.305	-0.249827589528231
ERCC1	EPHA2_pT594	0.305	0.768352356474142
PREX1	JAGGED1	0.305	-0.220187731834258
BAX	EIF4G1_pS1108	0.305	0.237272491952892
KRAS	X4EBP1	0.3	0.371428571428571
RPA32	DJ1	0.3	-0.199559347479012
CYTOKERATIN19	KU80	0.3	-0.00948196114708603
KRAS	MTOR_pS2448	0.3	0.0857142857142857
CK5	SMAD3	0.3	0.219355805725678
KRAS	RICTOR_pT1135	0.3	-0.371428571428571
GCN5L2	BRD4	0.3	0.194083694083694
MYOSINIIA	CDK1_pY15	0.3	-0.136002886002886
SDHA	COMPLEXIISUBUNIT	0.3	-0.48102925637967
ADAR1	DMHISTONEH3	0.3	0.443335611756664
PARP1	SNF5	0.3	0.216328461280361
P27_pT198	AIB1	0.3	0.427150786308973
CD55	ID2	0.3	0.558433549182855
ERALPHA_pS118	SYK_pY525Y526	0.3	0.382990533346852
CRAF_pS338	CASEINKINASE	0.3	-0.405140522510737
H2AX_pS139	AKT	0.295	-0.0301812233856768
TUBERIN_pT1462	AKT_pT308	0.295	0.503832422728907
FRA1	CAVEOLIN1	0.295	0.656330988522769
PAX2	CAVEOLIN1	0.295	0.21450046253469
NRF2	NOTCH1	0.295	-0.152746046117393
PDL1	PEA15	0.295	0.163186993122845
COUPTFII	RB_pS807S811	0.295	0.148340120942861
SHP2_pY542	STAT3_pY705	0.295	0.528801806150791
KRAS	P90RSK	0.295	-0.714285714285714
NRF2	P62LCKLIGAND	0.295	0.128011404133999
DETYROSINATEDALPHATUBULIN	JAB1	0.295	0.732773293067652
CASPASE3	PDGFRB	0.295	-0.244847587313341
FLT3FLK2	UQCRC2	0.295	0.454013567334953
PREX1	ATR_pS428	0.295	-0.00908502664431357
LCK	PLCGAMMA2_pY1217	0.295	0.703876160561614
CD20	DNATOPOISOMERASE2BETA	0.295	0.356398396546408
X4EBP1	X4EBP1_pT37T46	0.29	0.264354950009466
CK5	BID	0.29	-0.524322397950338
RBM15	BAP1C4	0.29	0.312469674062093
CK5	HEREGULIN	0.29	0.399675598464533
KRAS	RAB11	0.29	0.542857142857143
KRAS	RAPTOR	0.29	0.657142857142857
MRE11	TSC1	0.29	0.11409059414467
PARPAB3	CASPASE8	0.29	-0.122120670981809
LCN2A	SNAIL	0.29	0.219453593387551
ARAF	GATA6	0.29	0.0197668022763801
BACTI	ARAF	0.29	NA
CHK1	AURORAB	0.29	0.480279037429085
ATP5A	UQCRC2	0.29	0.377915586819696
CD20	EGFR_pY992	0.29	0.277477407668399
CASPASE9	HISTONEH3_pS10	0.29	0.492952612344381
SYK	X1433SIGMA	0.29	-0.565217391304348
MRE11	BID	0.285	0.352426580734576
CYTOKERATIN19	COLLAGENVI	0.285	-0.440433363428016
GCN5L2	KU80	0.285	0.140692640692641
GCN5L2	LKB1	0.285	-0.131529581529582
ENY2	P70S6K	0.285	0.174963924963925
COUPTFII	PAXILLIN	0.285	0.672189312600271
TAZ_pS79	SMAD4	0.285	0.422633364168979
ELK1_pS383	G6PD	0.285	-0.312939651980748
MSH6	MSH2	0.285	0.495600902982346
GCN5L2	CDK1_pY15	0.285	0.0793650793650794
SMAD3	THYMIDILATESYNTHASE	0.285	0.20564771441947
CYTOKERATIN8	ALPHACATENIN	0.285	0.684435707678076
CLAUDIN7	AIB1	0.285	-0.287465309898242
HER2_pY1248	CYTOKERATIN18	0.285	0.33708190005702
TRAF1	IRF4	0.285	0.361702127659574
SMAD1	PLCGAMMA1	0.285	0.350971322849214
ACC1	ACC_pS79	0.28	0.0323945109074555
SYNAPTOPHYSIN	ASNS	0.28	0.31049295910308
ER	HER2	0.28	0.853665309144761
KRAS	HER3	0.28	0.0857142857142857
MYOSINIIA	P27	0.28	-0.278571428571429
CKIT_pY703	P38_pT180Y182	0.28	0.577674992291088
PLCGAMMA2	SYK	0.28	0.576618675106944
CASPASE3CLEAVED	X4EBP1_pT70	0.28	0.317761332099907
FAK_pY397	ARID1A	0.28	0.0045662100456621
MYOSINIIA	P21	0.28	-0.0803030303030303
SMAD3	GATA6	0.28	0.046613059288684
CJUN_pS73	PDL1	0.28	0.147770222110921
ASNS	TTF1	0.28	0.191741634720965
JAGGED1	UGT1A	0.28	0.332103772645654
CDK1	ATR_pS428	0.28	-0.206561609813814
GSK3ALPHABETA	ATR_pS428	0.28	-0.0565666706024619
GSK3ALPHABETA	EPHA2_pT594	0.28	0.624727954081714
SRC_pY527	BETACATENIN_pS33	0.28	0.319611470860315
CLAUDIN7	CYTOKERATIN17	0.28	-0.173219241443108
SYK	CD19	0.28	0.555913023050654
SRC_pY416	CD38	0.28	-0.46395312981807
PREX1	AR	0.275	0.149209297903206
CYTOKERATIN8	BETACATENIN	0.275	0.568108233117484
AURORAB	CYCLINB1	0.275	0.4856590177445
MYOSINIIA	ERALPHA	0.275	-0.359090909090909
STAT5_pY694	PAI1	0.275	-0.416798376100283
SF2	BAP1C4	0.275	0.133670581203193
SYK_pY323	FOXO3A_pS318S321	0.275	0.622695035460993
MYOSINIIA	GAPDH	0.275	-0.0297258297258297
MYOSINIIA	PRDX1	0.275	-0.22972582972583
KRAS	TRANSGLUTAMINASE	0.275	0.828571428571429
BACTI	SNAIL	0.275	NA
ELK1_pS383	CABL	0.275	0.109774157719363
EZH2	CHROMOGRANINANTERM	0.275	0.360576756371482
ALPHACATENIN	XIAP	0.275	-0.568570767807586
GATA3	BETACATENIN_pS33	0.275	-0.366558741905643
CLAUDIN7	STAT1_pY701	0.275	0.26445420906568
FOXO3A_pS318S321	NUR77	0.275	0.568352292850737
SMAD1	TIF1ALPHA	0.275	0.333415675948369
EZH2	BCLXL	0.27	-0.359738783687465
AXL	CAVEOLIN1	0.27	0.610179980085978
PLK1	PDCD4	0.27	-0.0730896796757152
GATA6	ARAF	0.27	0.0197668022763801
BCLXL	KEAP1	0.27	-0.325389609138718
EEF2	DETYROSINATEDALPHATUBULIN	0.27	-0.381432802665679
HISTONEH3	MERLIN	0.27	0.00523125640329767
ADAR1	ROCK1	0.27	-0.15336053360482
PI3KP85	ATR_pS428	0.27	0.0103342348509369
EGR2	TELOMERASE	0.27	0.622757019468357
CD20	ENOS_pS1177	0.27	-0.246253469010176
KI67	ALPHATUBULIN	0.27	0.789142542167221
CD20	EZRIN_pY353	0.27	0.057482755271856
TRAF1	JUNB	0.27	0.175701510946654
HISTONEH3_pS10	EGFR_pY1173	0.265	0.148442799876657
HSP27_pS82	MIG6	0.265	0.329415031469826
RPA32	PCNA	0.265	0.274825960059785
CASPASE3CLEAVED	YAP	0.265	0.047641073080481
CASPASE3	BRAF_pS445	0.265	0.228591980122627
ERCC5	COG3	0.265	-0.133885505298957
PKCPANBETAII_pS660	KEAP1	0.265	-0.420649005340442
ALPHACATENIN	TTF1	0.265	0.542857142857143
CYTOKERATIN19	NAPSINA	0.265	-0.253315105946685
BAK	P63	0.265	-0.174238600681936
CYCLIND1	P63	0.265	-0.131060854154225
PEA15_pS116	CYTOKERATIN19	0.265	-0.246174256448229
CASPASE7CLEAVEDD198	H2AX_pS140	0.265	0.634641490805874
CYTOKERATIN17	CYCLINA	0.265	0.384944495837188
SRC_pY416	DNATOPOISOMERASE2ALPHA	0.265	0.191489361702128
RB	SMAD6	0.265	-0.527474560592044
CD44	CDK1	0.26	-0.07311004784689
MACC1	HER3	0.26	0.627597233726956
JAGGED1	NOTCH1	0.26	0.249114155088659
MYOSINIIA	P70S6K_pT389	0.26	0.128066378066378
CHROMOGRANINANTERM	ANNEXINVII	0.26	-0.0537169386064611
CDK1_pY15	FOXM1	0.26	0.291217976173034
KRAS	GSK3_pS9	0.26	-0.257142857142857
MYOSINIIA	HEREGULIN	0.26	0.495526695526696
JAGGED1	PREX1	0.26	-0.220187731834258
KRAS	RB	0.26	0.771428571428571
BID	EZH2	0.26	-0.336044383656643
TAU	NAPSINA	0.26	-0.339111414900889
CYCLINE1	P63	0.26	-0.370258712026353
CASPASE3	CYCLOPHILINF	0.26	-0.0148289655565199
CD26	MDM2_pS166	0.26	0.140194989510058
COMPLEXIISUBUNIT	SDHA	0.26	-0.48102925637967
CD26	SOD2	0.26	0.357707022090584
X4EBP1_pT70	STAT3	0.26	-0.440911193339501
HISTONEH3	VIMENTIN	0.26	NA
BRAF	PKCDELTA_pT507	0.26	0.109783002167824
KRAS	X53BP1	0.255	-0.0857142857142857
BETACATENIN_pS33S37T41	EIF4E	0.255	-0.404872032069072
XIAP	ERK2	0.255	0.301803885291397
DIRAS3	MRE11	0.255	0.259581791947298
KRAS	P53	0.255	-0.542857142857143
GCN5L2	ARAF_pS299	0.255	-0.384733794176891
ATR	XBP1	0.255	0.139423670245588
KEAP1	EZH2	0.255	0.347714357265319
EGFR_pY1173	MACC1	0.255	0.341470979175897
BID	CK5	0.255	-0.524322397950338
P27_pT198	HLAE	0.255	0.452821461609621
P27_pT198	P90RSK_pS221	0.255	-0.374614911981198
ID2	CD55	0.255	0.558433549182855
CASPASE9CLEAVED	HISTONEH2AX_pS139	0.255	-0.390810977489978
PLCGAMMA2	ID3	0.255	0.519879447688126
LCK	LAT_pY191	0.255	0.668342585416109
CKIT	PAX5	0.255	-0.205797101449275
LCK	PLCGAMMA2	0.255	0.557287168420001
CKIT	TCF4	0.255	0.307184705519581
HISTONEH2AX_pS139	AKT	0.25	-0.176934936786926
NRF2	AKT_pT308	0.25	-0.0487989058195758
TTF1	ASNS	0.25	0.191741634720965
ENY2	ATM	0.25	-0.359235209235209
CHROMOGRANINANTERM	CYCLIND1	0.25	-0.118223497909884
P16INK4A	CYCLINE1	0.25	0.314608988063379
SLC1A5	ERALPHA	0.25	-0.298196248196248
TAU	S6	0.25	0.0275679176177203
CHROMOGRANINANTERM	SMAD3	0.25	0.0072272640262714
HSP27_pS82	YAP_pS127	0.25	0.664167592249784
P62LCKLIGAND	BAP1C4	0.25	-0.152207200871981
TWIST	PREX1	0.25	0.26124657919494
CHROMOGRANINANTERM	GATA6	0.25	0.476550478969098
TAU	JAK2	0.25	-0.297698383314822
FAK_pY397	SHP2_pY542	0.25	0.11962248216179
PEA15_pS116	ROCK1	0.25	0.215908785458543
NCADHERIN	FLT3FLK2	0.25	0.479849562956559
P27_pT198	CMYC_pT58	0.25	-0.0194663945515475
CD20	IRS1_pS307	0.25	-0.10786308973173
BECLIN	MT1F	0.25	-0.137372802960222
SMAD1	CD38	0.25	0.194326241134752
CASPASE9	EGFR_pY992	0.25	0.353701956796095
MTOR	HISTONEH2AX_pS139	0.25	-0.34899784150478
SMAD1	IRF4	0.25	0.214431082331175
CRM1	CDK1	0.245	0.298886809269884
COUPTFII	FIBRONECTIN	0.245	0.55800320868814
FRA1	MIG6	0.245	0.479043062200957
BETACATENIN_pS33	P53	0.245	0.395120259019426
CYTOKERATIN8	P90RSK_pT359S363	0.245	0.686170212765957
CASPASE9CLEAVED	STAT5ALPHA	0.245	-0.159111933395005
MYOSINIIA	TUBERIN_pT1462	0.245	0.377489177489177
SMAC	ENY2	0.245	0.122222222222222
RPA32	MSH6	0.245	-0.273408137628112
RBM15	BRD4	0.245	0.413432283813933
SLC1A5	COG3	0.245	0.167412204831435
COUPTFII	IRF1	0.245	-0.20045045045045
PLCGAMMA2_pY759	P16INK4A	0.245	-0.439096630877453
IRS1_pS307	CASPASE9	0.245	-0.514534493132835
EZH2	E2F1	0.245	0.119450598139123
P70S6K_pT389	MACC1	0.245	-0.220891525880834
SYNAPTOPHYSIN	TTF1	0.245	0.110009439232533
IGF1R_pY1135Y1136	MCL1	0.245	0.386028708133971
CASPASE3CLEAVED	XIAP	0.245	0.497224791859389
CDK1	SNF5	0.245	0.107393346591017
LCK	GATA2	0.245	-0.386794634597595
P27_pT198	SMAD3_pS423	0.245	-0.653214616096207
CYTOKERATIN17	STAT1_pY701	0.245	0.248265494912118
BCLXL	DNATOPOISOMERASE2BETA	0.245	0.468146777674992
JUNB	TRAF1	0.245	0.175701510946654
LCK	CASK	0.245	-0.610484119642306
MYOSINIIA	ASNS	0.24	-0.320634920634921
PUMA	BCL2	0.24	0.40580649142293
IRS1_pS307	CHK2	0.24	-0.0818686401480111
ELK1_pS383	ARID1A	0.24	-0.41555596692583
ALPHACATENIN	MYH11	0.24	0.428571428571429
PLCGAMMA2_pY759	PDCD4	0.24	-0.184221092346488
P62LCKLIGAND	RICTOR_pT1135	0.24	0.245400126577828
ELK1_pS383	SCD	0.24	0.0435949648278415
CASPASE3CLEAVED	X1433ZETA	0.24	-0.0913506012950971
FIBRONECTIN	ENY2	0.24	-0.0722943722943723
CYCLIND1	CD274	0.24	-0.178534500652339
TTF1	KEAP1	0.24	-0.130026391323612
RAD51	THYMIDILATESYNTHASE	0.24	0.430438842653265
JAGGED1	TYRO3	0.24	0.321031112424241
CLAUDIN7	GATA2	0.24	0.196114708603145
CD20	CDK4	0.24	-0.187912426765341
LCK	CREL	0.24	0.542028985507246
CASK	FAS	0.24	0.390194264569843
RICTOR	ID3	0.24	0.558926919518964
CKIT_pY703	LAT_pY191	0.24	0.880909820603561
FOXO3A_pS318S321	SYK_pY323	0.24	0.622695035460993
CD20	CREB	0.24	0.266315258979263
MYOSINIIA	X1433EPSILON	0.235	-0.138383838383838
CTLA4	CJUN_pS73	0.235	-0.0767332919483878
SYNAPTOPHYSIN	CAVEOLIN1	0.235	-0.40815819383175
CDK1_pY15	CDK1	0.235	0.31695622449902
CYTOKERATIN19	JNK_pT183PY185	0.235	0.0408182154757497
HISTONEH2AX_pS139	MTOR	0.235	-0.34899784150478
P62LCKLIGAND	CASPASE8	0.235	0.18704159488063
CK5	SNAIL	0.235	0.241998805648129
TAU	CASPASE3	0.235	-0.381124274959891
MYOSINIIA	COG3	0.235	0.0969860252319019
INPP4B	MACC1	0.235	0.543855830170869
PI3KP110B	ATP5H	0.235	0.12294829075651
P38ALPHA	P38	0.235	0.258919211437828
ATM_pS1981	TFAM	0.235	0.0190825857912146
PREX1	TWIST	0.235	0.26124657919494
BECLIN	CYCLINA	0.235	-0.137950971322849
P38MAPK	BLIMP1	0.235	-0.327906259636139
CKIT	CO86	0.235	-0.223900810710238
CD20	CYCLINE4	0.235	0.20345359235276
SYK	ERG123	0.235	0.42904717853839
SYNAPTOPHYSIN	ACC_pS79	0.23	0.189595654100287
PLCGAMMA2_pY759	ATM	0.23	0.10881772183142
COUPTFII	DVL3	0.23	0.540077748981858
CD274	IGFBP2	0.23	-0.504590792216926
CRM1	INPP4B	0.23	0.0339266911452449
KRAS	JNK2	0.23	-0.0285714285714286
KRAS	PKCALPHA	0.23	0.371428571428571
SLC1A5	S6	0.23	0.47012987012987
KRAS	ANNEXINVII	0.23	-0.2
KEAP1	G6PD	0.23	-0.301107665042091
GYS_pS641	P21	0.23	0.188617367263339
SYNAPTOPHYSIN	RAPTOR	0.23	0.224956174991813
SNF5	TIGAR	0.23	-0.20056357285674
IRS1_pS307	BRAF_pS445	0.23	-0.661321656856408
SYK_pY323	BRAF_pS445	0.23	0.73292423482995
CXCR4	IRF1	0.23	0.415864494631618
TTF1	THYMIDILATESYNTHASE	0.23	-0.259122344011866
HISTONEH3	DMHISTONEH3	0.23	0.402488038277512
CASPASE7CLEAVEDD198	MMP2	0.23	0.461557447858818
NAPSINA	TAU	0.23	-0.339111414900889
RB_pS807S811	ATR_pS428	0.23	0.156747786477452
PAXILLIN	H2AX_pS139	0.23	-0.534522325686009
HER2	SNF5	0.23	-0.442120251509573
BECLIN	CMYC_pT58	0.23	0.0401400073698576
SURVIVIN	CYTOKERATIN18	0.23	0.427336590621173
P27_pT198	ER_pS167	0.23	0.367946345975948
SYK	PLCGAMMA2	0.23	0.576618675106944
H2AX_pS139	BCLXL	0.225	-0.353430036964982
KRAS	CRAF	0.225	0.428571428571429
PLK1	CYCLINB1	0.225	0.768330722119356
MAPK_pT202Y204	MEK1_pS217S221	0.225	0.372098538296388
TAZ_pS79	NCADHERIN	0.225	0.237049028677151
SNF5	NFKBP65_pS536	0.225	-0.278774560164176
MYOSINIIA	PDK1_pS241	0.225	-0.3995670995671
RPA32	PDK1_pS241	0.225	0.259006283915018
KEAP1	HEREGULIN	0.225	0.31356856618474
CK5	NDRG1_pT346	0.225	0.472874727899674
RPA32	PDK1	0.225	0.274825960059785
ATP5A	RICTOR	0.225	-0.345859558188325
BACTIN	PREX1	0.225	0.0170303606797357
JAGGED1	CMET	0.225	0.182430380863766
DJ1	HIF1ALPHA	0.225	0.0807524316658076
CIAP	RET_pY905	0.225	-0.24642573174558
X1433BETA	RET_pY905	0.225	0.0684816979847219
CASPASE3	COX2	0.225	-0.12140565222757
IRF1	CXCR4	0.225	0.415864494631618
PR	H2AX_pS140	0.225	0.631741330371467
IGFBP2	IGFBP5	0.225	0.113206086252316
IGF1R_pY1135Y1136	PAR	0.225	-0.134736842105263
NDRG1_pT346	SDHA	0.225	0.163612242379366
CHK1	ATR_pS428	0.225	0.0564110158274478
PDK1_pS241	CMYC_pT58	0.225	-0.505522649206853
ALPHACATENIN	CYTOKERATIN8	0.225	0.684435707678076
TAU	GPR82	0.225	0.584908569768365
BAK	HISTONEH3_pS10	0.225	-0.164353993216158
PCNA	HISTONEH3_pS10	0.225	0.320875732346593
SRC_pY416	LAT	0.225	-0.370582793709528
SRC_pY416	PLCGAMMA2_pY1217	0.225	0.531807949927521
IRF4	TRAF1	0.225	0.361702127659574
TELOMERASE	CASEINKINASEIALPHA	0.225	0.543509096515572
BRAF	TCF4	0.225	-0.102500848055148
TUBERIN_pT1462	AKT_pS473	0.22	0.566001588320445
ALPHACATENIN	EGFR	0.22	0.603623995052566
KRAS	FOXO3A	0.22	-0.657142857142857
TAU	P27	0.22	-0.0207221931086219
KRAS	PRAS40_pT246	0.22	0.714285714285714
BLNK_pY96	SHC_pY317	0.22	0.324602147960574
DETYROSINATEDALPHATUBULIN	NRAS	0.22	-0.176107614463779
GATA6	X1433BETA	0.22	0.275465558289775
CHROMOGRANINANTERM	X1433BETA	0.22	0.0772466708629623
ELK1_pS383	ADAR1	0.22	0.151301986918425
MRE11	JAB1	0.22	0.47115892160922
SNF5	CMET	0.22	-0.0771402584309335
CD274	CASPASE8	0.22	0.342943857247953
KRAS	SMAC	0.22	0.542857142857143
ATR	CHK1_pS296	0.22	0.268388251264964
HISTONEH3	JAK2	0.22	0.206898679501419
PRDX1	PARP1	0.22	-0.0386724386724387
AMPKALPHA	CD274	0.22	-0.288286796550515
PEA15	PDL1	0.22	0.163186993122845
H2AX_pS139	E2F1	0.22	0.448382672559109
CYCLIND1	CHROMOGRANINANTERM	0.22	-0.118223497909884
HISTONEH3	H2AX_pS140	0.22	0.484542761940022
MSH2	HSP27_pS82	0.22	0.0203319758114279
EEF2	IGFBP5	0.22	-0.140748175215313
NRAS	MDM2_pS166	0.22	0.0519072167834012
BCL2A1	P38	0.22	0.106164383561644
VIMENTI	PORI	0.22	NA
CMYC	CDK4	0.22	0.516990440949738
SRC_pY416	SGK	0.22	0.0414274457111353
TELOMERASE	BCRYSTALLIN	0.22	0.734566759173605
RB	EZRIN_pY353	0.22	-0.0817010164768511
X4EBP1_pT37T46	X4EBP1	0.215	0.264354950009466
GPBB	AKT	0.215	-0.0987712746613119
EIF4G1_pS1108	BAX	0.215	0.237272491952892
HSP27_pS82	CAVEOLIN1	0.215	0.689837097371344
KRAS	CHK2_pT68	0.215	-0.371428571428571
PARPAB3	CIAP	0.215	-0.188685475104948
ENY2	FIBRONECTIN	0.215	-0.0722943722943723
PARPAB3	NFKBP65_pS536	0.215	-0.0864889152507028
ENOS_pS1177	NFKBP65_pS536	0.215	0.700400863398088
SLC1A5	P70S6K	0.215	-0.123160173160173
RPA32	P70S6K	0.215	0.274828079869884
AXL	PAI1	0.215	0.631983894725916
KRAS	STAT3_pY705	0.215	-0.485714285714286
ID3	SYK	0.215	0.924761023743447
CYTOKERATIN8	YAP_pS127	0.215	0.558163737280296
AURORAB	FOXM1	0.215	0.121744322766705
KRAS	MYH11	0.215	-0.485714285714286
NDUFB4	JAB1	0.215	0.152153895779013
RBM15	SLC1A5	0.215	0.566883116883117
TSC1	SLC1A5	0.215	0.0294837722584509
HISTONEH3	CABL	0.215	0.0379180550413427
CASPASE3CLEAVED	PKM2	0.215	0.5
ADAR1	PYGM	0.215	0.268696778970752
PEA15_pS116	CTLA4	0.215	-0.366144153524418
ERCC1	CTLA4	0.215	0.261668173252411
CHROMOGRANINANTERM	PDCD1	0.215	0.0398586041494096
HEREGULIN	THYMIDILATESYNTHASE	0.215	0.226376984828379
SYNAPTOPHYSIN	P63	0.215	-0.29757276877733
AURORAB	BAP1	0.215	0.109766504467024
CRM1	BAP1	0.215	-0.0866580438684467
S6	COX2	0.215	-0.0785075547332716
SCD	HSP27	0.215	-0.431964162275668
CASPASE7CLEAVEDD198	HSP27_pS82	0.215	-0.434838948537579
JAGGED1	CRM1	0.215	-0.103561252447626
SNF5	CRM1	0.215	0.0982576310748427
P27_pT198	MGMT	0.215	0.0499526276635048
CLAUDIN7	COMT	0.215	0.10440081187658
BAX	VASP	0.215	-0.132531606537157
BETACATENIN	CO86	0.215	0.288819829871742
CD20	EIF4G1_pS1108	0.215	0.0136377687182287
CRAF_pS338	DNATOPOISOMERASE2ALPHA	0.215	-0.149922910884983
LCK	EZRIN_pY353	0.215	0.215328834184412
ACC_pS79	ACC1	0.21	0.0323945109074555
LCN2A	CMET_pY1235	0.21	0.229823269549481
SNF5	CRAF	0.21	0.246112508606171
CASPASE3CLEAVED	CHK2	0.21	0.34331637372803
KRAS	CIAP	0.21	0.542857142857143
EGFR_pY1173	EGFR_pY1068	0.21	0.304665557852857
P63	GAB2	0.21	-0.39069754002042
EPHA2_pT594	GSK3ALPHABETA	0.21	0.624727954081714
SNF5	INPP4B	0.21	-0.214496431819803
ALPHACATENIN	LKB1	0.21	-0.595282146160962
LDHA	MEK1	0.21	-0.202085647291127
ELK1_pS383	NOTCH1	0.21	-0.0475132666913489
KRAS	P70S6K_pT389	0.21	-0.6
H2AX_pS140	PR	0.21	0.631741330371467
PLK1	RAD51	0.21	0.629846916187692
PDL1	SMAD3	0.21	0.207377691349209
KRAS	SRC_pY527	0.21	-0.657142857142857
SLC1A5	YB1	0.21	0.176695526695527
H2AX_pS140	BRAF	0.21	0.046279155868197
GCN5L2	BAP1C4	0.21	0.179148629148629
TTF1	CYCLINE2	0.21	0.19239082275433
EPHA2_pT594	FASN	0.21	0.188209195051542
P62LCKLIGAND	G6PD	0.21	0.127539467669913
ID3	RICTOR	0.21	0.558926919518964
ELK1_pS383	TIGAR	0.21	-0.0520177711958534
H2AX_pS139	X1433ZETA	0.21	0.0521211889214507
PREX1	CASPASE8	0.21	-0.147417739469219
CMET	CASPASE8	0.21	0.0764324758510576
PARPAB3	SNAIL	0.21	-0.244491545083264
TTF1	GATA6	0.21	0.136269835039716
HISTONEH3	BCL2A1	0.21	-0.00401086017524374
CHROMOGRANINANTERM	ERCC5	0.21	0.00751093217237194
GSK3_pS9	GYS_pS641	0.21	-0.0479149287604697
MSH2	PYGM	0.21	-0.0875601629026286
BCLXL	EZH2	0.21	-0.359738783687465
RBM15	EZH2	0.21	0.215274219336942
CJUN_pS73	KEAP1	0.21	-0.178428464102021
AMPKALPHA	LCN2A	0.21	-0.190408539862404
CAVEOLIN1	SYNAPTOPHYSIN	0.21	-0.40815819383175
BCL2A1	COMPLEXIISUBUNIT	0.21	-0.327766936383133
YAP	CONNEXIN43	0.21	0.272800197457732
IRF1	CYCLOPHILINF	0.21	0.0656093940560781
TUBERIN	P27KIP1	0.21	0.170986054547698
PORIN	SDHA	0.21	-0.094070097494755
PORI	UBAC1	0.21	NA
SF2	ATR_pS428	0.21	-0.113943323522616
CDK1	CRM1	0.21	0.298886809269884
BRN2	CYCLINA	0.21	0.388413506012951
P90RSK	P70S6K_pS371	0.21	0.0420240746475734
HISTONEH3_pS10	DNMT3A	0.21	0.701880974406414
BAX	PLCGAMMA1	0.21	-0.152883132901634
LCK	X1433SIGMA	0.21	-0.352204748689485
FAS	CASK	0.21	0.390194264569843
PDL1	ASNS	0.205	-0.317807401128855
CYCLINA	BECLIN	0.205	-0.137950971322849
CDK1_pY15	CHK1_pS345	0.205	-0.225410548462293
CASPASE3CLEAVED	CLAUDIN7	0.205	-0.337072155411656
FLT3FLK2	IRS1	0.205	0.418925327995995
RAPTOR	MTOR	0.205	-0.0725278190187594
TAU	P27_pT157	0.205	0.32700851536468
PAX2	PAI1	0.205	0.453977798334875
CXCR4	PAXILLIN	0.205	-0.513297544119462
HSP27_pS82	PAXILLIN	0.205	0.660588670862643
SLC1A5	PEA15	0.205	-0.361688311688312
AKT_pT308	PTEN	0.205	-0.370396867280157
KRAS	S6_pS240S244	0.205	-0.0857142857142857
LAT_pY191	SRC_pY416	0.205	0.761317538022851
DIRAS3	MYH11	0.205	0.278054190704929
CASPASE3CLEAVED	TAZ	0.205	-0.109851988899167
LDHA	TIGAR	0.205	0.408644946316179
CYCLIND1	BRD4	0.205	-0.137850756357629
ENY2	CDK1_pY15	0.205	0.263636363636364
IRS1	KEAP1	0.205	0.329225019745333
CHK1_pS345	P63	0.205	-0.280293194120707
HER2_pY1248	RET_pY905	0.205	0.572264342944887
XBP1	ATR	0.205	0.139423670245588
RAD50	HIAP	0.205	0.012371961002098
MEK1_pS217S221	MEK2	0.205	0.27922061242761
DETYROSINATEDALPHATUBULIN	PORIN	0.205	-0.0226150808342589
GSK3ALPHABETA	RPA32	0.205	0.243077506555459
AKT	H2AX_pS139	0.205	-0.0301812233856768
UGT1A	JAGGED1	0.205	0.332103772645654
BECLIN	BRN2	0.205	-0.0417437557816836
HER2	CYTOKERATIN18	0.205	0.456072388962226
ID2	HLAE	0.205	0.314585260561209
SMAD1	MME	0.205	0.233672525439408
GATA3	PDCD5	0.205	NA
BAX	CLIP115	0.205	-0.36490903484428
SYK_pY525Y526	DNMT3A	0.205	0.673265494912118
HLAE	ID2	0.205	0.314585260561209
SRC	PLCGAMMA2_pY1217	0.205	-0.530019427308027
P70S6K_pS371	AR	0.2	0.0248864323030265
CRM1	CRAF	0.2	0.0879552060350221
ELK1_pS383	COLLAGENVI	0.2	0.363194312361039
ELK1_pS383	EIF4E	0.2	-0.512859494592414
TAU	ERALPHA_pS118	0.2	0.153694338226224
CYTOKERATIN18	HER2	0.2	0.456072388962226
CRM1	HER3_pY1289	0.2	0.157001380492012
LCN2A	INPP4B	0.2	0.493434191902637
KRAS	MTOR	0.2	-0.828571428571429
KRAS	NCADHERIN	0.2	-0.142857142857143
GYS_pS641	NF2	0.2	0.104108129644941
MYOSINIIA	P90RSK_pT359S363	0.2	0.190912534528433
MME	STAT5ALPHA	0.2	0.257516188714154
ALPHACATENIN	G6PD	0.2	0.2
SYNAPTOPHYSIN	MYOSINIIA_pS1943	0.2	-0.438194217025293
PLCGAMMA2_pY759	TAZ	0.2	-0.527397260273972
P70S6K	ENY2	0.2	0.174963924963925
IGFBP5	MSH2	0.2	0.105831151891514
X1433BETA	GATA6	0.2	0.275465558289775
P62LCKLIGAND	P16INK4A	0.2	-0.0952902499912099
HISTONEH3	SHP2_pY542	0.2	-0.094641522225519
ELK1_pS383	PARP1	0.2	0.396026163149451
PARPAB3	CD274	0.2	-0.279566805091855
CYCLIND1	CTLA4	0.2	0.0229325301634219
BAK	LCN2A	0.2	-0.16439779834613
SYNAPTOPHYSIN	LCN2A	0.2	-0.392232085796931
CYCLINE1	MACC1	0.2	-0.254630039875941
CLAUDIN7	NRF2	0.2	-0.144934599603167
ECADHERIN	P63	0.2	0.593669257801526
JNK2	BACTIN	0.2	-0.265389787259215
IGF1R_pY1135Y1136	CD29	0.2	-0.411565276828435
NAPSINA	CYTOKERATIN19	0.2	-0.253315105946685
SHP2_pY542	MEK2	0.2	-0.316884027033002
IRF1	PLK4	0.2	0.251912871775885
ATM_pS1981	PUMA	0.2	0.0250217899380356
SOD2	UGT1A	0.2	0.552943354313217
HER3_pY1289	ATR_pS428	0.2	-0.107426054987307
CMYC	H2AX_pS139	0.2	0.359225386030997
MDM2_pS166	H2AX_pS139	0.2	-0.431646095120338
BETACATENIN	EIG121	0.2	-0.337534690101758
NCADHERIN	PAX2	0.2	0.290471785383904
P27_pT198	STAT1_pY701	0.2	-0.223982423681776
HER2_pY1248	SURVIVIN	0.2	0.331059204440333
NEUROPILIN1	CD55	0.2	0.353684859697811
CKIT	FAS	0.2	-0.0242368177613321
BAX	HISTONEH2AX_pS139	0.2	0.147826086956522
ERALPHA_pS118	BCRYSTALLIN	0.2	-0.450152641368546
CD55	NEUROPILIN1	0.2	0.353684859697811
SYNAPTOPHYSIN	AMPK_pT172	0.195	0.229006486585956
ALPHACATENIN	BCL2	0.195	-0.14038058377681
MGMT	CMET_pY1235	0.195	0.0857142857142857
KRAS	CYCLIND1	0.195	0.428571428571429
CYTOKERATIN17	GSK3ALPHABETA_pS21S9	0.195	0.00809435707678076
KRAS	IGFBP2	0.195	-0.771428571428571
KEAP1	NOTCH1	0.195	0.253202596752133
CYTOKERATIN19	NOTCH1	0.195	0.0593915833641861
STAT6_pY641	P53	0.195	0.459550593751736
ALPHACATENIN	PI3KP110ALPHA	0.195	-0.575955491049831
RPA32	SMAD1	0.195	0.282790348739564
THYMIDILATESYNTHASE	SMAD3	0.195	0.20564771441947
MYOSINIIA	XRCC1	0.195	0.237734487734488
HSP27_pS82	YAP	0.195	0.278662223867703
MYOSINIIA	YB1	0.195	0.488311688311688
IRS1_pS307	YB1_pS102	0.195	0.246130126426149
CDK1_pY15	BRCA2	0.195	-0.0423583124622721
SLC1A5	GAPDH	0.195	0.0533189033189033
PRAS40	GAPDH	0.195	0.180766382821177
GYS_pS641	GSK3_pS9	0.195	-0.0479149287604697
PEA15	MYOSINIIA_pS1943	0.195	-0.10992143924588
H2AX_pS139	MYOSINIIA_pS1943	0.195	-0.0247068802021739
ZNF342	RAB25	0.195	-0.141288930003084
KRAS	SF2	0.195	0.0857142857142857
P63	EPPK1	0.195	0.638242376374949
FLT3FLK2	X1433BETA	0.195	0.459410824259627
CDK1_pY15	GCN5L2	0.195	0.0793650793650794
MSH2	MSH6	0.195	0.495600902982346
ACC_pS79	BRD4	0.195	-0.274219936495721
EEF2	LDHA	0.195	0.138220412193015
SYNAPTOPHYSIN	CD274	0.195	-0.319035618190603
CRAF_pS338	CTLA4	0.195	-0.322819018521651
G6PD	CTLA4	0.195	0.155520099555074
LKB1	E2F1	0.195	-0.0305619232917879
MACC1	NRF2	0.195	-0.186852497543873
CD274	PARPAB3	0.195	-0.279566805091855
BCLXL	THYMIDILATESYNTHASE	0.195	-0.292556490917147
PKCPANBETAII_pS660	THYMIDILATESYNTHASE	0.195	-0.277936409400934
PARPAB3	TTF1	0.195	0.0871269514104994
GAB2	P63	0.195	-0.39069754002042
RAPTOR	SYNAPTOPHYSIN	0.195	0.224956174991813
CD20	FAK	0.195	-0.111069996916435
CASPASE7CLEAVEDD198	P38ALPHA	0.195	0.111228069351431
PEA15_pS116	PAR	0.195	-0.336110082685425
PKCDELTA_pS664	PDGFRB	0.195	0.23790561868418
IGF1R_pY1135Y1136	PLCGAMMA2_pY759	0.195	0.0740635237145706
IRF1	STAT5A	0.195	0.279881976672087
IGFBP5	TWIST	0.195	0.337491847476718
GSK3_pS9	H2AX_pS139	0.195	-0.190294052103402
BECLIN	EIG121	0.195	0.261216466234968
AR	P70S6K_pS371	0.195	0.0248864323030265
GATA3	STAT1_pY701	0.195	0.405411655874191
CMYC	CMYC_pT58S62	0.195	0.530804810360777
DNATOPOISOMERASE2BETA	BLNK_pY96	0.195	0.337568944816523
BLNK_pY96	EGR1	0.195	-0.350092303912245
DNMT3A	HISTONEH3_pS10	0.195	0.701880974406414
SYK_pY525Y526	HISTONEH3_pS10	0.195	0.700524205982115
ERALPHA_pS118	CASK	0.195	0.118227512467941
PARPAB3	ACC_pS79	0.19	0.211667050644972
ER	AKT	0.19	-0.216927503149603
KRAS	AMPK_pT172	0.19	0.0857142857142857
ATM_pS1981	ATM	0.19	0.149287808866323
CK5	BCLXL	0.19	-0.442316657355859
RPA32	CDK1	0.19	0.23623725126468
MRE11	CHK1	0.19	0.528421136866011
CTLA4	CYCLIND1	0.19	0.0229325301634219
EGFR	EGFR_pY1068	0.19	0.538603964057818
SYNAPTOPHYSIN	IGFBP2	0.19	0.262275818227351
MYOSINIIA	LKB1	0.19	-0.401154401154401
MYOSINIIA	MAPK_pT202Y204	0.19	0.29025974025974
MTOR	MTOR_pS2448	0.19	0.089474033272071
H2AX_pS139	NFKBP65_pS536	0.19	-0.267613293268539
H2AX_pS139	PEA15	0.19	-0.279636350860156
SYK_pY352	SRC_pY416	0.19	0.173774952103627
E2F1	ARID1A	0.19	0.139194134015021
MYOSINIIA	G6PD	0.19	0.0793650793650794
H2AX_pS139	GSK3_pS9	0.19	-0.190294052103402
CYTOKERATIN19	PEA15_pS116	0.19	-0.246174256448229
PKCDELTA_pS664	PKCPANBETAII_pS660	0.19	0.567787451187679
MYOSINIIA	RICTOR_pT1135	0.19	0.500721500721501
MGMT	RICTOR_pT1135	0.19	0.0857142857142857
ELK1_pS383	SF2	0.19	-0.101073676416142
RICTOR_pT1135	P62LCKLIGAND	0.19	0.245400126577828
GATA6	DIRAS3	0.19	0.18874120739892
ERALPHA	PREX1	0.19	0.205634645744447
MYOSINIIA	P16INK4A	0.19	0.207720057720058
CASPASE3	PARP1	0.19	0.494987181834829
CYCLINE1	LCN2A	0.19	-0.332458598591184
NOTCH1	NRF2	0.19	-0.152746046117393
E2F1	CHROMOGRANINANTERM	0.19	0.189900021190114
NDRG1_pT346	CK5	0.19	0.472874727899674
EGFR_pY1068	RET_pY905	0.19	0.585032637622698
IGF1R_pY1135Y1136	ATR	0.19	0.218865345181135
SNF5	BAP1	0.19	0.0801354127971507
CASPASE8	GLUTAMINASE	0.19	0.155066024929039
P38	HIAP	0.19	-0.0927742811304455
YAP_pS127	HSP27_pS82	0.19	0.664167592249784
RB_pS807S811	P27KIP1	0.19	-0.104344070097495
PCNA	P90RSK_pT573	0.19	-0.23793656670369
BACTI	PDGFRB	0.19	NA
FOXM1	PLK1	0.19	0.572010366530914
PCADHERIN	TYRO3	0.19	0.0648993034952624
EPHA2_pT594	FLT3FLK2	0.19	-0.418341863875557
TYRO3	JAGGED1	0.19	0.321031112424241
EIF4E	BETACATENIN_pS33S37T41	0.19	-0.404872032069072
XRCC1	GATA2	0.19	-0.300763182238668
PARPCLEAVED	HLAE	0.19	0.108117483811286
BRN2	STAT1_pY701	0.19	0.352335800185014
PCNA	CDK4	0.19	0.358741905642923
P38MAPK	CYCLINE4	0.19	-0.260191181005242
FAK_pY925	EZRIN_pY353	0.19	0.411496749944873
FOXO3A_pS318S321	PKCDELTA_pT507	0.19	-0.458702113324333
CYTOKERATIN18	X4EBP1_pS65	0.185	-0.509670145626524
BLNK_pY96	AMPK_pT172	0.185	-0.388283528075343
HISTONEH3_pS10	BAK	0.185	-0.164353993216158
TAZ_pS79	BCL2	0.185	0.270004625346901
DMK9HISTONEH3	BCLXL	0.185	-0.251511785758361
CRM1	CHK1	0.185	0.156480008971445
TAZ_pS79	JNK_pT183PY185	0.185	0.415602836879433
BACTIN	PCADHERIN	0.185	-0.0884740100644417
RPA32	PR	0.185	0.282681247524773
AKT_pS473	PTEN	0.185	-0.405247564233541
FRA1	YB1	0.185	0.289614957423177
PARP1	BAP1C4	0.185	-0.0741702741702742
NRF2	BRCA2	0.185	0.19620311687311
ALPHACATENIN	NDRG1_pT346	0.185	0.485714285714286
CTLA4	RICTOR_pT1135	0.185	-0.135896118306405
ECADHERIN	EPPK1	0.185	0.661866408919387
BAP1C4	P62LCKLIGAND	0.185	-0.152207200871981
BRCA2	P62LCKLIGAND	0.185	0.198811574839141
KRAS	X1433BETA	0.185	0.314285714285714
PKCPANBETAII_pS660	PREX1	0.185	0.196606298260171
HSP27_pS82	MSH6	0.185	0.205726274219425
TFAM	PKM2	0.185	-0.0923423423423423
PDL1	E2F1	0.185	0.0299840110959142
PKCPANBETAII_pS660	EZH2	0.185	-0.315571032907818
BRCA2	KEAP1	0.185	-0.110521854712874
RET_pY905	MACC1	0.185	0.209593443390367
TUBERIN_pT1462	NRF2	0.185	-0.123750264876423
PARPAB3	NRF2	0.185	0.203114653100672
H2AX_pS139	ATP5H	0.185	0.443374072966157
CD44	CD29	0.185	0.470840738209159
HER2	ER	0.185	0.853665309144761
PEA15_pS116	ER	0.185	-0.37526224854992
ARID1A	FAK_pY397	0.185	0.0045662100456621
CABL	MCL1	0.185	-0.22895841046526
CD26	MERLIN	0.185	-0.00408621744806942
PR	MMP2	0.185	0.439559422436135
STAT3_pY705	PI3KP110B	0.185	0.0630322102924843
NDUFB4	TWIST	0.185	0.114528478771535
NFKBP65_pS536	SNF5	0.185	-0.278774560164176
GATA3	BRCA1	0.185	-0.175331765514308
X4EBP1	IRS1_pS307	0.185	0.101641998149861
P27	CDK4	0.185	0.213567684242985
PLCGAMMA2	BLNK_pY84	0.185	0.670263506200833
PCNA	CABL_pT735	0.185	-0.364539007092199
FAK	ENOS_pS1177	0.185	0.36922602528523
LCK	ID3	0.185	0.458649398704903
PLK1	KI67	0.185	0.688834085822326
EGFR_pY992	PLCGAMMA1_pY783	0.185	0.0677050200572846
ID3	PLCGAMMA2	0.185	0.519879447688126
BRAF	ALPHATUBULIN	0.185	0.200191186995794
CMYC	CASEINKINASE	0.185	0.589728610841833
RAPTOR	CULLIN2	0.185	0.0410114091890225
KRAS	CMET_pY1235	0.18	0.657142857142857
KRAS	EGFR_pY1173	0.18	0.6
PKCPANBETAII_pS660	MEK1_pS217S221	0.18	0.261080755010262
ATP5A	MTOR	0.18	-0.37782302850796
IRS1_pS307	PRAS40_pT246	0.18	0.0149167437557817
KRAS	PTEN	0.18	0.771428571428571
PI3KP110B	STAT3_pY705	0.18	0.0630322102924843
PKM2	STAT5ALPHA	0.18	-0.104222060517357
X1433SIGMA	SYK	0.18	-0.565217391304348
PYGM	XRCC1	0.18	-0.199123781315562
P27_pT157	BAP1C4	0.18	0.18768679019725
ERALPHA	FASN	0.18	0.161472795866244
THYMIDILATESYNTHASE	HEREGULIN	0.18	0.226376984828379
MYOSINIIA	MYH11	0.18	0.337734487734488
KRAS	PI3KP85	0.18	-0.6
SNF5	RAPTOR	0.18	0.254804674281013
KRAS	TSC1	0.18	NA
DIRAS3	EPPK1	0.18	0.105954431981998
CMET	SNAIL	0.18	0.0568687055613886
HSP70	MYOSINIIA	0.18	-0.394588744588745
FAK_pY397	DUSP4	0.18	0.261818181818182
IGFRB	JAK2	0.18	-0.245156115019129
COUPTFII	P16INK4A	0.18	0.478680735530051
DVL3	KEAP1	0.18	0.362314345707076
CD274	LCN2A	0.18	0.43804727133678
LCN2A	MACC1	0.18	0.422672662187573
X1433BETA	CHROMOGRANINANTERM	0.18	0.0772466708629623
INPP4B	RET_pY905	0.18	0.221606317353919
ATM	ATM_pS1981	0.18	0.149287808866323
CASPASE3	COMPLEXIISUBUNIT	0.18	-0.07480311924139
EEF2	DMK9HISTONEH3	0.18	0.0122794026903616
PEA15_pS116	IGFBP5	0.18	-0.270864294029469
BCL2	MYOSIN11	0.18	0.0121170293519683
STATHMIN	P27KIP1	0.18	0.597556460570159
UQCRC2	PI3KP110B	0.18	0.193292607676169
RAD51	PLK1	0.18	0.629846916187692
CD26	UGT1A	0.18	0.45637418240158
DMK9HISTONEH3	VIMENTIN	0.18	NA
RB_pS807S811	XPA	0.18	-0.483246945575713
EIF4G	FLT3FLK2	0.18	-0.367534104353135
PREX1	H2AX_pS139	0.18	-0.147179170141185
BECLIN	ATRIP	0.18	-0.295675300647549
XRCC1	ATRIP	0.18	-0.171947271045328
DNATOPOISOMERASE2BETA	P70S6K_pS371	0.18	0.326997902433908
HER2	STAT1_pY701	0.18	0.403677150786309
PAI1	STAT5_pY694	0.18	-0.416798376100283
LCK	CJUN	0.18	-0.302744372494604
LCK	BLNK_pY84	0.18	0.474930619796485
CKIT	CABL_pT735	0.18	0.223065063213074
P38MAPK	CD19	0.18	0.121213182102381
BRAF	PLCGAMMA1_pY783	0.18	0.150729285587714
CRAF_pS338	CASEINKINASEIALPHA	0.18	-0.263151403021893
BLNK_pY96	SMAD6	0.18	0.408742252003617
KRAS	X1433EPSILON	0.175	0.142857142857143
IRS1_pS307	X4EBP1	0.175	0.101641998149861
CASPASE3	ACC_pS79	0.175	0.20415084607155
PDL1	AKT_pT308	0.175	-0.270156614205082
PARPAB3	ASNS	0.175	0.210948764177085
PKM2	ATM	0.175	-0.185300642218755
PYGM	BAK	0.175	0.312939651980748
SMAD3_pS423	BETACATENIN	0.175	0.670328399629972
CASPASE3CLEAVED	CHK1_pS345	0.175	0.435823311748381
X1433BETA	CIAP	0.175	-0.158709442974345
TAZ_pS79	CLAUDIN7	0.175	-0.326780758556892
NRF2	CYCLIND1	0.175	-0.0695170580416482
RPA32	EEF2	0.175	0.274935061274576
E2F1	EGFR_pY1173	0.175	-0.0692303375426032
ALPHACATENIN	GATA3	0.175	0.19142073859055
KRAS	MIG6	0.175	0.0285714285714286
CTLA4	P70S6K_pT389	0.175	-0.166206664390353
KRAS	RB_pS807S811	0.175	-0.371428571428571
GCN5L2	S6	0.175	0.395670995670996
PRDX1	STAT5ALPHA	0.175	-0.184867796490981
ERCC5	STAT5ALPHA	0.175	0.0895107415351078
SMAD3_pS423	YAP_pS127	0.175	0.483464384828862
HSP27_pS82	TAZ	0.175	0.610452918672097
CD49B	TRANSGLUTAMINASE	0.175	0.438559584025881
AKT_pS473	TUBERIN_pT1462	0.175	0.566001588320445
NRF2	TUBERIN_pT1462	0.175	-0.123750264876423
ER_pS167	TUBERIN_pT1462	0.175	0.342506938020352
ENY2	ACETYLATUBULINLYS40	0.175	-0.0695539241441458
GCN5L2	ACETYLATUBULINLYS40	0.175	0.0593445047806638
CDK1_pY15	ENY2	0.175	0.263636363636364
CASPASE8	CMET	0.175	0.0764324758510576
HSP27_pS82	MSH2	0.175	0.0203319758114279
COUPTFII	RB	0.175	-0.253301246451931
NFKBP65_pS536	SETD2	0.175	-0.246038336574807
ENY2	BRD4	0.175	-0.176262626262626
BRCA2	CDK1_pY15	0.175	-0.0423583124622721
VIMENTI	DUSP4	0.175	NA
BRCA2	ERCC5	0.175	-0.0328706796526142
P21	GYS_pS641	0.175	0.188617367263339
CJUN_pS73	CTLA4	0.175	-0.0767332919483878
PARPAB3	CTLA4	0.175	0.0573390406293122
AKT_pT308	PDL1	0.175	-0.270156614205082
SYNAPTOPHYSIN	MACC1	0.175	-0.33178709714704
CLAUDIN7	THYMIDILATESYNTHASE	0.175	-0.442811735470324
AXL	TTF1	0.175	-0.21207836489376
KEAP1	TTF1	0.175	-0.130026391323612
CASPASE3	NAPSINA	0.175	0.497652308341078
BCLXL	P63	0.175	-0.297738436940148
LCN2A	P63	0.175	0.464232274581681
CYCLINE2	SYNAPTOPHYSIN	0.175	0.321625474369594
PAXILLIN	ATP5H	0.175	-0.498100973385005
JAK2	CD29	0.175	-0.516290262865605
NOTCH3	CONNEXIN43	0.175	0.00965691719116376
JAK2	COXIV	0.175	0.181167468838702
PCADHERIN	COX2	0.175	0.224469848436918
CD20	COX2	0.175	0.280296022201665
CASPASE3	ELK1_pS383	0.175	0.0484388498087128
BCLXL	ER	0.175	-0.54723559175614
ELK1_pS383	FAK_pY397	0.175	0.108971985684314
YB1	FRA1	0.175	0.289614957423177
HER3	TYRO3	0.175	0.404762286072946
SMAD4	VIMENTIN	0.175	NA
RAB25	ATR_pS428	0.175	-0.044794520227905
PREX1	SNF5	0.175	0.119655221154138
CLAUDIN7	BRN2	0.175	-0.218547641073081
YAP_pS127	P90RSK_pS221	0.175	0.42966084344038
HER3_pY1289	STAT5_pY694	0.175	0.349166941487785
SMAD1	ZNF342	0.175	0.18236201048412
CD55	CD38	0.175	0.664261486278137
BRAF	EGFR_pY992	0.175	-0.105355455479925
BRAF	EGR1	0.175	0.0361171150697374
CMYC	LAT	0.175	-0.389700894233734
EGR2	SPIB	0.175	-0.0214852431848148
BAX	CD11	0.175	-0.138205365402405
SGK_pS78	CULLIN2	0.175	-0.303484427998767
CD20	TIF1ALPHA	0.175	-0.0689293559197349
SNF5	X53BP1	0.17	0.354583245646684
KRAS	AKT_pT308	0.17	-0.428571428571429
AMPKALPHA	AMPK_pT172	0.17	0.0630150383938484
MYOSINIIA	AR	0.17	-0.20981240981241
KRAS	BAX	0.17	-0.428571428571429
ALPHACATENIN	BETACATENIN	0.17	0.785417439703154
RICTOR_pT1135	BID	0.17	-0.219447494239548
CABL_pT735	CKIT	0.17	0.223065063213074
STAT5_pY694	CMET_pY1235	0.17	-0.0105805041770768
RPA32	CYCLINB1	0.17	0.235331320305262
P62LCKLIGAND	CYCLINE1	0.17	-0.0365801132168348
KEAP1	DVL3	0.17	0.362314345707076
ER	INPP4B	0.17	0.0916944341601876
IGFBP5	JNK2	0.17	-0.317949115234592
MEK1_pS217S221	MAPK_pT202Y204	0.17	0.372098538296388
EZH2	MAPK_pT202Y204	0.17	-0.323875479185529
KRAS	PKCDELTA_pS664	0.17	-0.0857142857142857
GSK3_pS9	PTEN	0.17	-0.0485116089437538
GATA6	SMAD3	0.17	0.046613059288684
P63	SMAD3	0.17	0.0618225258140348
BETACATENIN_pS33	SRC_pY527	0.17	0.319611470860315
CYTOKERATIN19	STAT3_pY705	0.17	-0.0681991804986457
MGMT	ANNEXINVII	0.17	0.657142857142857
GSK3ALPHABETA_pS21S9	GSK3_pS9	0.17	0.244419784188226
PREX1	PKCPANBETAII_pS660	0.17	0.196606298260171
BRD4	RBM15	0.17	0.413432283813933
SETD2	RICTOR_pT1135	0.17	-0.284880388494995
SMAD3_pS423	TRANSGLUTAMINASE	0.17	0.0104070305272895
AURORAB	ANNEXIN1	0.17	-0.390621761457033
CYTOKERATIN19	SETD2	0.17	-0.298579990290184
PDL1	SNAIL	0.17	0.157053418350639
ERALPHA	MYOSINIIA	0.17	-0.359090909090909
UGT1A	CD26	0.17	0.45637418240158
AURORAB	CHK1_pS296	0.17	0.253322251937744
DIRAS3	ERCC5	0.17	0.248546821459021
SNF5	PARP1	0.17	0.216328461280361
GAPDH	LDHA	0.17	0.399975317783537
PEA15_pS116	LDHA	0.17	0.265241268665926
P70S6K_pT389	CTLA4	0.17	-0.166206664390353
X1433ZETA	KEAP1	0.17	0.0464545086783148
BRCA2	NRF2	0.17	0.19620311687311
SCD	NRF2	0.17	0.207614956367629
SYNAPTOPHYSIN	NRF2	0.17	0.154042495810137
THYMIDILATESYNTHASE	RET_pY905	0.17	-0.244915453813023
JAK2	BCATENIN_pT41S45	0.17	0.395180760075621
CYCLINB1	CD44	0.17	-0.447272615080834
IGF1R_pY1135Y1136	COXIV	0.17	0.213069036226931
CD49B	COX2	0.17	0.209929433659108
EIG121	IGFRB	0.17	-0.525323774283071
ETS1	IGFBP5	0.17	-0.151819014896517
PCADHERIN	MDM2_pS166	0.17	0.0395998364802326
CASPASE3	MEK2	0.17	0.15324571146489
MYOSIN11	MERLIN	0.17	-0.147036472897839
IGF1R_pY1135Y1136	P38ALPHA	0.17	0.130065081096432
CD20	PLCGAMMA2_pY759	0.17	0.461486278137527
PKM2	TFAM	0.17	-0.0923423423423423
MERLIN	TYRO3	0.17	0.127660617635839
HER2	ATR_pS428	0.17	0.0441252400787086
MSH2	FLT3FLK2	0.17	-0.0723371279263004
CASPASE7CLEAVEDD198	H2AX_pS139	0.17	0.400580790581532
NRAS	H2AX_pS139	0.17	0.0568876494039677
ANNEXINVII	SNF5	0.17	0.0592904913461793
P53	BETACATENIN_pS33	0.17	0.395120259019426
PAI1	PAX2	0.17	0.453977798334875
PLK1_pT210	TELOMERASE	0.17	0.235436262445572
CRAF_pS338	SGK_pS78	0.17	0.190502621029911
CMYC	BLIMP1	0.17	0.414246068455134
BRCA2	CABL_pT735	0.17	0.170397779833488
BRAF	CREL	0.17	0.124333158651732
CMYC	DNMT1	0.17	0.512920135676842
SMAD1	ID2	0.17	0.194202898550725
SRC_pY416	LAT_pY191	0.17	0.761317538022851
CD20	PLK1_pT210	0.17	-0.0285147884848335
FOXO3A_pS318S321	ALPHATUBULIN	0.17	-0.579525131051496
CD20	CD11	0.17	0.335553499845822
CASPASE9	JAK1	0.17	-0.168974706556989
CRM1	AR	0.165	0.121175622432245
PKCPANBETAII_pS660	ASNS	0.165	0.30233472415148
CD274	ASNS	0.165	-0.349656310635701
THYMIDILATESYNTHASE	BCLXL	0.165	-0.292556490917147
CYTOKERATIN19	CMYC	0.165	0.518292937009515
SYNAPTOPHYSIN	CRAF	0.165	0.1836567315486
GLUTAMINASE	CRAF	0.165	0.11884487226953
H2AX_pS140	CASPASE7CLEAVEDD198	0.165	0.634641490805874
RET_pY905	EGFR_pY1173	0.165	0.529761770030387
CD44	FIBRONECTIN	0.165	0.333271627792176
P90RSK_pT573	MAPK_pT202Y204	0.165	0.511168702949525
SNF5	P53	0.165	0.167566716585905
CYTOKERATIN8	P53	0.165	0.322733580018501
EPHA2_pT594	PR	0.165	0.493710191669457
CTLA4	SMAD3	0.165	-0.13113582707193
ER_pS167	SMAD3	0.165	NA
CYTOKERATIN8	TUBERIN	0.165	-0.487858464384829
H2AX_pS139	YB1_pS102	0.165	-0.369110151824482
BRD4	BAP1C4	0.165	0.233718538755354
SYNAPTOPHYSIN	BAP1C4	0.165	0.180697732657818
PLK1	FASN	0.165	0.00950265333826977
DMK9HISTONEH3	NRAS	0.165	0.452239911144021
CHK2_pT68	P21	0.165	-0.0730205958406375
ELK1_pS383	RAB11	0.165	0.0403245711464889
ELK1_pS383	DIRAS3	0.165	0.186103912131309
ER	JAB1	0.165	0.560074664297361
FOXM1	CDK1_pY15	0.165	0.291217976173034
SOD2	CD26	0.165	0.357707022090584
ENY2	CHK1_pS296	0.165	0.203030303030303
CYCLIND1	ERCC5	0.165	-0.0710426089508444
PLCGAMMA2_pY759	IGF1R_pY1135Y1136	0.165	0.0740635237145706
HISTONEH3	IRF1	0.165	0.00385659632234975
PEA15	CD274	0.165	0.162043768201252
AMPKALPHA	PDL1	0.165	-0.256998073044493
TUBERIN_pT1462	PDL1	0.165	-0.220592937912966
MAPK_pT202Y204	EZH2	0.165	-0.323875479185529
CK5	KEAP1	0.165	0.399807362601375
DIRAS3	LCN2A	0.165	0.383921704418041
BAK	MACC1	0.165	-0.158376837279189
ACC_pS79	PARPAB3	0.165	0.211667050644972
PKCALPHA_pS657	P63	0.165	-0.448323091444973
SMAD3	P63	0.165	0.0618225258140348
ACC_pS79	SYNAPTOPHYSIN	0.165	0.189595654100287
HISTONEH3	DMK9HISTONEH3	0.165	0.143950786056049
ETS1	HEXOKINASEII	0.165	0.0596692582993953
PEA15_pS116	HEXOKINASEII	0.165	0.299148463532025
CASPASE3	IGFRB	0.165	-0.0928051339010243
IGF1R_pY1135Y1136	PORIN	0.165	-0.0670122176971492
FASN	STAT5A	0.165	0.0588923305311718
CD49B	TWIST	0.165	-0.143747248170989
PCADHERIN	UBAC1	0.165	-0.18005815792648
P38	XPF	0.165	0.241978279649512
EIF4G	ATR_pS428	0.165	0.0431932461097244
EPHA2_pT594	ATR_pS428	0.165	-0.0389765505937839
CMYC	CRM1	0.165	0.126329171729055
NFKBP65_pS536	CRM1	0.165	-0.209372555013681
EEF2	EPHA2_pT594	0.165	-0.544146274836826
NCADHERIN	H2AX_pS139	0.165	-0.368675923681968
EPHA2_pT594	H2AX_pS139	0.165	0.381942122482364
MTOR	SNF5	0.165	-0.056470332403601
PORI	VIMENTI	0.165	NA
RHEB	CYTOKERATIN18	0.165	-0.12945563880406
P27_pT198	GATA2	0.165	-0.289777983348751
X1433SIGMA	CO86	0.165	0.258105455214686
ERALPHA_pS118	ENOS_pS1177	0.165	0.392241512413201
SRC	LAT_pY191	0.165	-0.690874464742909
CD20	PLCGAMMA1_pY783	0.165	0.410669133518347
FOXO3A_pS318S321	PLK1_pT210	0.165	-0.111031034808201
CULLIN2	SPIB	0.165	0.271662041319766
PDK1	DNATOPOISOMERASE2BETA	0.165	0.421029910576627
P38MAPK	CULLIN2	0.165	-0.332839962997225
CD20	CULLIN2	0.165	0.0857847671908726
RICTOR_pT1135	ACC_pS79	0.16	-0.236529958755277
PDCD5	ACC1	0.16	NA
TAZ_pS79	AKT_pS473	0.16	-0.362910686043389
ACC_pS79	AMPK_pT172	0.16	0.266606878750299
P38_pT180Y182	AMPK_pT172	0.16	0.241438908299785
PARPAB3	AMPK_pT172	0.16	0.116042826204861
ERCC5	ASNS	0.16	-0.206168911079076
H2AX_pS139	BIM	0.16	0.446915166633119
NDUFB4	CMET_pY1235	0.16	-0.0122595849315577
MDM2	CD49B	0.16	0.255882080975216
TWIST	CHK2_pT68	0.16	0.0136099907589613
YAP	CIAP	0.16	0.266577831494796
EIF2A_pS51	CLAUDIN7	0.16	NA
ERCC5	CYCLIND1	0.16	-0.0710426089508444
P63	CYCLINE1	0.16	-0.370258712026353
COUPTFII	EEF2K	0.16	-0.128995433789954
MYOSINIIA	ERALPHA_pS118	0.16	0.527777777777778
CONNEXIN43	FIBRONECTIN	0.16	0.517832901394545
KRAS	FIBRONECTIN	0.16	0.142857142857143
E2F1	LKB1	0.16	-0.0305619232917879
YB1_pS102	MEK1_pS217S221	0.16	0.238403532584012
PDL1	MIG6	0.16	0.288173990098438
P62LCKLIGAND	NFKBP65_pS536	0.16	0.167616330213501
SETD2	NFKBP65_pS536	0.16	-0.246038336574807
COMPLEXIISUBUNIT	PCADHERIN	0.16	-0.045971337333971
FRA1	PAXILLIN	0.16	0.638744909292854
MYOSINIIA	PTEN	0.16	-0.253391053391053
GAB2_pY452	SHC_pY317	0.16	NA
CTLA4	BRCA2	0.16	-0.0344657367733934
SMAD3	FASN	0.16	-0.0553712419775112
CRM1	G6PD	0.16	-0.125397881017099
AKT_pT308	GSK3_pS9	0.16	0.19876616655353
PKCPANBETAII_pS660	MYH11	0.16	-0.135374476892703
THYMIDILATESYNTHASE	PKCPANBETAII_pS660	0.16	-0.277936409400934
PLK1_pT210	RAB25	0.16	0.142826285685095
MERLIN	TAZ	0.16	0.13477782055363
COMPLEXIISUBUNIT	TIGAR	0.16	-0.0747498582983066
PRDX1	GCN5L2	0.16	-0.16998556998557
LCN2A	CMET	0.16	0.209195646970631
TAZ_pS79	PARPCLEAVED	0.16	0.157724329324699
CXCR4	RB	0.16	0.0512464519313834
GCN5L2	AXL	0.16	0.0689033189033189
COG3	ERCC5	0.16	-0.133885505298957
PEA15_pS116	HIF1ALPHA	0.16	-0.428394023784987
COG3	MACC1	0.16	0.0226667543220815
NRF2	MACC1	0.16	-0.186852497543873
CYCLIND1	NRF2	0.16	-0.0695170580416482
CYCLINE2	PARPAB3	0.16	0.1215005503312
TTF1	CHROMOGRANINANTERM	0.16	-0.013948874034405
AMPKALPHA	SYNAPTOPHYSIN	0.16	0.18531457971117
CRAF	SYNAPTOPHYSIN	0.16	0.1836567315486
MYOSINIIA_pS1943	SYNAPTOPHYSIN	0.16	-0.438194217025293
PR	ATP5A	0.16	0.270424534123164
PCADHERIN	COMPLEXIISUBUNIT	0.16	-0.045971337333971
CYCLINA	CYTOKERATIN19	0.16	0.891766882516189
SMAD4	DMK9HISTONEH3	0.16	0.467943971368629
CYCLINB1	ER	0.16	-0.418456127360237
PDCD4	HIAP	0.16	0.195576833539043
PLCGAMMA2_pY759	MCL1	0.16	0.219548315438726
PR	P90RSK_pT573	0.16	-0.1663272861903
CD26	SDHA	0.16	0.291651240281377
YB1	XPF	0.16	-0.11832037516969
ATR_pS428	CRM1	0.16	-0.155415728172404
BECLIN	FLT3FLK2	0.16	-0.0107820882368217
NOTCH1	JAGGED1	0.16	0.249114155088659
XRCC1	STAT6_pY641	0.16	-0.0699191787008709
RHEB	SURVIVIN	0.16	0.25659111933395
CULLIN2	BLNK_pY96	0.16	0.156321939874489
RAPTOR	CLIP115	0.16	0.338883749614554
CASPASE8	GPR82	0.16	-0.0881282762873882
CASPASE9	SYK_pY525Y526	0.16	0.547967695741539
PKCPANBETAII_pS660	ACC_pS79	0.155	0.332043409332934
CD274	AMPKALPHA	0.155	-0.288286796550515
ERALPHA	AR	0.155	0.183728994029336
THYMIDILATESYNTHASE	CRAF	0.155	0.218843895727278
MRE11	CD31	0.155	0.478323339901024
CD274	CYCLIND1	0.155	-0.178534500652339
SGK_pS78	EGFR_pY1173	0.155	0.00696885599753315
RPA32	EIF4E	0.155	0.282790348739564
BETACATENIN_pS33S37T41	ERK2	0.155	-0.288559975331483
CASPASE3CLEAVED	GATA3	0.155	-0.469935245143386
PYK2_pY402	MEK1_pS217S221	0.155	0.240086339808819
MRE11	P27_pT157	0.155	-0.0431704478244357
ENY2	P70S6K_pT389	0.155	0.276334776334776
LKB1	PEA15	0.155	0.110410147322527
FAK	S6	0.155	0.200123342584027
CD44	S6_pS240S244	0.155	-0.227477477477477
CD274	STAT5ALPHA	0.155	0.364626170092205
SMAD3_pS423	YAP	0.155	0.23300185013876
AKT_pT308	BAP1C4	0.155	0.0521360008438522
IGFBP5	ETS1	0.155	-0.151819014896517
BAP1C4	G6PD	0.155	-0.148793994585282
CTLA4	G6PD	0.155	0.155520099555074
AKT_pS473	GSK3_pS9	0.155	0.202857426378987
PRAS40_pT246	GSK3_pS9	0.155	-0.128755815193733
IRS1	MYOSINIIA_pS1943	0.155	-0.0716240785419631
EZH2	PKCPANBETAII_pS660	0.155	-0.315571032907818
EPHA2_pT594	SF2	0.155	0.626582089664907
GAPDH	TIGAR	0.155	0.112454709321863
MYOSINIIA	TSC1	0.155	0.0105757009187922
AKT_pS473	ACETYLATUBULINLYS40	0.155	0.243660614003692
BACTIN	CASPASE8	0.155	-0.0483130799425126
THYMIDILATESYNTHASE	GATA6	0.155	-0.173695446868433
DIRAS3	CHK1_pS296	0.155	0.347594335610935
PDCD1L1	IGF1R_pY1135Y1136	0.155	0.0416951469583048
STAT3_pY705	SHP2_pY542	0.155	0.528801806150791
RHEB	GYS	0.155	-0.189528569665556
ETS1	LDHA	0.155	0.0717326915957053
ATR_pS428	PKM2	0.155	0.0879074014601243
JAGGED1	PKM2	0.155	0.0191904833662979
CYCLINE2	CTLA4	0.155	0.153415534961555
BRCA2	MACC1	0.155	-0.168072277551964
THYMIDILATESYNTHASE	MACC1	0.155	-0.341047176898923
RET_pY905	TTF1	0.155	0.261511173696922
SMAD3	CK5	0.155	0.219355805725678
ELK1_pS383	NAPSINA	0.155	0.128440083919536
IGFBP2	SYNAPTOPHYSIN	0.155	0.262275818227351
TTF1	SYNAPTOPHYSIN	0.155	0.110009439232533
PUMA	ATM_pS1981	0.155	0.0250217899380356
HLAE	ATM_pS1981	0.155	-0.323658649398705
RICTOR	ATP5A	0.155	-0.345859558188325
PREX1	BACTIN	0.155	0.0170303606797357
JAK2	COMPLEXIISUBUNIT	0.155	-0.0595308800067073
LCK	COUPTFII	0.155	-0.651548809083056
YB1	GLUTAMINASE	0.155	0.369893866469209
RPA32	MCL1	0.155	0.114421256299107
RB_pS807S811	PLK4	0.155	-0.177650252992719
CD26	PORIN	0.155	0.0103356781438973
MITOCHONDRIA	PORIN	0.155	0.0398926323583858
NF2	SDHA	0.155	-1
PKM2	STAT3	0.155	0.19403307417006
BACTI	UGT1A	0.155	NA
FIBRONECTIN	XPA	0.155	-0.254165124028138
ATM	ATR_pS428	0.155	-0.0360570628678933
HER3_pY1289	CRM1	0.155	0.157001380492012
FASN	FLT3FLK2	0.155	-0.0620384880812041
E2F1	H2AX_pS139	0.155	0.448382672559109
CRAF	SNF5	0.155	0.246112508606171
RICTOR	MDM2	0.155	-0.0986771100410569
BETACATENIN	AIB1	0.155	-0.370027752081406
P90RSK_pT359S363	BETACATENIN_pS33	0.155	0.426341350601295
P27_pT198	BRN2	0.155	-0.256244218316374
P27_pT198	CYTOKERATIN17	0.155	-0.126040703052729
LCK	EIG121	0.155	-0.113783533765032
GATA3	GATA2	0.155	0.197849213691027
HER2	GATA2	0.155	0.352220166512488
BRAF_pS445	IRS1_pS307	0.155	-0.661321656856408
SRC_pY416	MT1F	0.155	-0.200393154486586
PRAS40_pT246	TAZ_pS79	0.155	-0.48277058279371
SMAD1	CKIT_pY703	0.155	-0.268825161887142
BCLXL	EGR1	0.155	-0.148658121718699
LCK	PAX5	0.155	0.481097748997841
CKIT	PLCGAMMA1_pY783	0.155	0.186555658341042
BAX	DNATOPOISOMERASE2ALPHA	0.155	0.106876349059513
SRC_pY416	BCRYSTALLIN	0.155	0.312981806968856
X1433SIGMA	CAVEOLIN2	0.155	0.552513105149553
CD20	FAK_pY925	0.155	0.285353068146778
CYTOKERATIN8	BCL2	0.15	-0.249074930619796
MYH11	CYCLINE1	0.15	-0.110842624346718
MGMT	EEF2K	0.15	0.314285714285714
HSP27_pS82	EGFR	0.15	0.691503146982599
ALPHACATENIN	EGFR_pY1068	0.15	0.2
MYOSINIIA	FIBRONECTIN	0.15	0.193073593073593
KRAS	GSK3ALPHABETA_pS21S9	0.15	-0.0285714285714286
PREX1	IGFBP2	0.15	0.179002723279636
SYNAPTOPHYSIN	IRS1	0.15	-0.18431931575196
H2AX_pS139	IRS1	0.15	-0.216948322800602
ER	NOTCH1	0.15	-0.300968776996174
COX2	PCADHERIN	0.15	0.224469848436918
TYRO3	PCADHERIN	0.15	0.0648993034952624
P90RSK_pT573	PCNA	0.15	-0.23793656670369
CIAP	YAP	0.15	0.266577831494796
LCN2A	BAP1C4	0.15	-0.19207306354776
KEAP1	BRCA2	0.15	-0.110521854712874
MEK2	BRCA2	0.15	0.03961784901215
MYOSINIIA	EIF4G	0.15	0.171139971139971
PRDX1	G6PD	0.15	0.283402482331845
EPHA2_pT594	MYOSINIIA_pS1943	0.15	-0.0515056646634278
ENY2	PRDX1	0.15	0.0191919191919192
JAGGED1	RAPTOR	0.15	-0.210423357173622
KEAP1	RICTOR_pT1135	0.15	-0.197181714858123
GATA6	ACVRL1	0.15	0.331207220915065
CK5	CMET	0.15	0.186172487526728
CRM1	ERCC1	0.15	0.183570482685173
FLT3FLK2	ERCC1	0.15	-0.227081096424982
PARP1	PARPCLEAVED	0.15	0.434928713555087
HLAE	PARPCLEAVED	0.15	0.108117483811286
PARPCLEAVED	SNAIL	0.15	0.060704742216951
X1433EPSILON	SLC1A5	0.15	-0.208730158730159
CIAP	BRD4	0.15	0.173799746360836
P63	COG3	0.15	0.0219066903105901
PLCGAMMA2_pY759	SHP2_pY542	0.15	0.346261292123132
INPP4B	GYS	0.15	0.159687814307811
AKT	GYS_pS641	0.15	-0.0153759214928921
CJUN_pS73	CD274	0.15	0.12186344024555
LCN2A	CD274	0.15	0.43804727133678
CTLA4	PDCD1	0.15	-0.0268815987370717
CYCLIND1	PDL1	0.15	-0.160786731135983
HISTONEH3_pS10	CASPASE9	0.15	0.492952612344381
NFKBP65_pS536	E2F1	0.15	-0.26710689474448
RICTOR_pT1135	KEAP1	0.15	-0.197181714858123
HER3	MACC1	0.15	0.627597233726956
AKT_pT308	NRF2	0.15	-0.0487989058195758
TFAM	ATM_pS1981	0.15	0.0190825857912146
IRF1	BCATENIN_pT41S45	0.15	0.325113577647411
ETS1	ELK1_pS383	0.15	-0.0553807231889424
PAI1	FRA1	0.15	0.693446871529063
ANNEXIN1	HSP27_pS82	0.15	0.682401579661854
BACTI	IGFRB	0.15	NA
COLLAGENVI	PUMA	0.15	0.24460076514871
RB_pS807S811	STAT5A	0.15	0.0223714372472308
CASPASE3	TAU	0.15	-0.381124274959891
YB1_pS102	TFAM	0.15	-0.137479945699124
CASPASE8	TWIST	0.15	-0.0942163931855077
DETYROSINATEDALPHATUBULIN	TWIST	0.15	0.451182501708817
PREX1	CRM1	0.15	0.0300719557760917
TIGAR	SNF5	0.15	-0.20056357285674
LCK	ATRIP	0.15	-0.183741905642923
SRC_pY416	ATRIP	0.15	-0.0736586493987049
X1433BETA	BRN2	0.15	-0.164084181313599
CYTOKERATIN19	CYTOKERATIN17	0.15	0.329209065679926
SYK	EIG121	0.15	0.482308048103608
LCK	MT1F	0.15	-0.325277520814061
COMT	MT1F	0.15	0.301257262646148
LCK	BLNK	0.15	0.443848288621647
RB	ENOS_pS1177	0.15	0.19309281529448
BRAF	KI67	0.15	0.160646540630201
PYK2_pY402	PLCGAMMA1_pY783	0.15	0.146222633364169
PLCGAMMA2	PLCGAMMA2_pY1217	0.15	0.616116627345276
CYCLINE4	CULLIN2	0.15	0.617391304347826
FAS	ACC1	0.145	-0.0459451125501079
PREX1	AKT	0.145	-0.147538339318515
BCLXL	ASNS	0.145	0.306552667485475
ASNS	BCLXL	0.145	0.306552667485475
CRM1	CMYC	0.145	0.126329171729055
KRAS	CRAF_pS338	0.145	0.0857142857142857
TELOMERASE	CRAF_pS338	0.145	-0.476287388220783
CASEINKINASE	CRAF_pS338	0.145	-0.405140522510737
KRAS	CYCLINE1	0.145	-0.142857142857143
CYCLINA	FOXO3A	0.145	0.475832562442183
MYOSINIIA	GATA3	0.145	-0.0761183261183261
SLC1A5	GATA3	0.145	-0.0639249639249639
ALPHACATENIN	HER3	0.145	0.657142857142857
STAT5_pY694	HER3_pY1289	0.145	0.349166941487785
CREL	IGFBP2	0.145	-0.636756090040086
KEAP1	IRS1	0.145	0.329225019745333
BACTIN	JNK2	0.145	-0.265389787259215
YB1_pS102	MAPK_pT202Y204	0.145	0.278363931206113
PREX1	MEK1	0.145	-0.116661020561996
ERALPHA_pS118	NFKBP65_pS536	0.145	-0.218320419400794
H2AX_pS139	NF2	0.145	-0.123173541421054
S6	NOTCH1	0.145	0.0817297211771738
MYOSINIIA	NOTCH1	0.145	0.267965367965368
MRE11	PCADHERIN	0.145	0.436597006345198
XIAP	P38MAPK	0.145	0.247918593894542
HISTONEH2AX_pS139	P53	0.145	0.43422756706753
HSP27_pS82	PAI1	0.145	0.527304701962236
TELOMERASE	PI3KP110ALPHA	0.145	0.518285103278067
TUBERIN_pT1462	PTEN	0.145	-0.182113380965979
PDK1	RAD50	0.145	0.2293327973823
PLK1	S6_pS240S244	0.145	0.467407223280084
EIF4G1_pS1108	S6_pS240S244	0.145	-0.138043839921618
CYTOKERATIN8	SRC	0.145	0.621184088806661
PLCGAMMA2_pY1217	SRC	0.145	-0.530019427308027
PDCD1	STAT5ALPHA	0.145	-0.190499123499836
XPA	YAP	0.145	-0.0496112550907071
CD274	BAP1C4	0.145	-0.228544156606602
ERCC5	BRCA2	0.145	-0.0328706796526142
CYTOKERATIN8	P27_pT198	0.145	-0.632400555041628
BRCA2	PDCD4	0.145	0.0591791019681868
HIAP	PDCD4	0.145	0.195576833539043
BRCA2	PRDX1	0.145	0.0848713125417531
CHROMOGRANINANTERM	ACETYLATUBULINLYS40	0.145	-0.156367629211535
SYNAPTOPHYSIN	ANNEXIN1	0.145	-0.389056269384138
SNAIL	CMET	0.145	0.0568687055613886
PDL1	CASPASE8	0.145	0.347198089037006
CYCLOPHILINF	BCL2A1	0.145	0.227944700057325
BCATENIN_pT41S45	CASPASE3	0.145	0.430260630802559
GLUTAMINASE	CD26	0.145	0.499352091817845
CJUN_pS73	COG3	0.145	-0.068897042235221
ARAF	DUSP4	0.145	0.0288868312281238
GCN5L2	ERCC5	0.145	-0.0383572147958249
HSP27	ERCC5	0.145	0.0937581858782965
PAR	P16INK4A	0.145	0.315406698564593
BRD4	PARP1	0.145	0.0616161616161616
MEK1_pS217S221	GYS_pS641	0.145	0.167008199663937
SNAIL	PDL1	0.145	0.157053418350639
CK5	EZH2	0.145	0.329510123095298
EZH2	KEAP1	0.145	0.347714357265319
ECADHERIN	MACC1	0.145	0.704996390455087
EPPK1	MACC1	0.145	0.421103427019322
BCL2A1	TTF1	0.145	-0.227668169170211
KEAP1	P63	0.145	0.365600739727611
ACC_pS79	RET_pY905	0.145	0.128483427637427
EGFR_pY1173	RET_pY905	0.145	0.529761770030387
SHC_pY317	RET_pY905	0.145	0.511499018993103
DIRAS3	SYNAPTOPHYSIN	0.145	-0.226687985205448
ELK1_pS383	BAP1	0.145	0.0229853140812045
FIBRONECTIN	CD44	0.145	0.333271627792176
FIBRONECTIN	COUPTFII	0.145	0.55800320868814
PEA15_pS116	DMK9HISTONEH3	0.145	0.0647908182154757
SHP2_pY542	FAK_pY397	0.145	0.11962248216179
VIMENTI	FRA1	0.145	NA
NF2	HEXOKINASEII	0.145	0.5
UGT1A	HYDIN	0.145	0.243798593113662
EEF2	NDUFB4	0.145	-0.173078565427422
JAK2	NOTCH3	0.145	-0.0495804023201283
NF2	PAR	0.145	-0.5
ATM_pS1981	PAR	0.145	-0.321902405355472
GSK3ALPHABETA	STAT5A	0.145	0.174286880776504
NFKBP65_pS536	TWIST	0.145	-0.160444593853508
BCL2A1	TWIST	0.145	-0.121621621621622
P38	XPA	0.145	0.00944094779711218
BRAF	ATR_pS428	0.145	-0.114228672285441
ERCC1	CRM1	0.145	0.183570482685173
SF2	EPHA2_pT594	0.145	0.626582089664907
BCLXL	H2AX_pS139	0.145	-0.353430036964982
SMAD3	H2AX_pS139	0.145	NA
TAZ	H2AX_pS139	0.145	-0.524480080225436
CYTOKERATIN18	BRN2	0.145	0.281923043684053
BCL2	COMT	0.145	0.146208917319146
BECLIN	CYTOKERATIN17	0.145	-0.0634828862164662
BAD_pS112	EIG121	0.145	0.0348057354301573
ACC1	ER_pS167	0.145	0.282839962997225
CYTOKERATIN18	HLAE	0.145	0.279552484867186
CLAUDIN7	MT1F	0.145	0.239708603145236
HER2	P70S6K_pS371	0.145	0.156719033846786
BETACATENIN	PDCD5	0.145	NA
BCL2	TAZ_pS79	0.145	0.270004625346901
P38MAPK	EGR2	0.145	-0.135023097199584
PCNA	BCL6	0.145	0.544848926841473
ERALPHA_pS118	BLNK_pY96	0.145	0.333833275403781
CAVEOLIN2	CO86	0.145	0.0464205889703222
CRAF_pS338	DNMT3A	0.145	-0.385383903792784
AKT	HISTONEH2AX_pS139	0.145	-0.176934936786926
MTOR_pS2448	HISTONEH3_pS10	0.145	0.121882610973818
PCNA	ID2	0.145	0.361948812827629
P38MAPK	PLCGAMMA1_pY783	0.145	0.160900400863398
CD20	CASEINKINASEIALPHA	0.145	-0.0206598828245452
CRAF_pS338	NEUROPILIN1	0.145	0.284119642306506
GSK3_pS9	AKT_pT308	0.14	0.19876616655353
CD274	AKT_pT308	0.14	-0.208105318769321
CYTOKERATIN17	AMPK_pT172	0.14	-0.163390379278446
ERALPHA_pS118	AR	0.14	0.110402631100062
LCN2A	BAK	0.14	-0.16439779834613
ER	BCLXL	0.14	-0.54723559175614
DNATOPOISOMERASE2BETA	BCLXL	0.14	0.468146777674992
SNF5	BECLIN	0.14	-0.0112989527383485
EZH2	BID	0.14	-0.336044383656643
PARPAB3	BID	0.14	0.289142626215305
CMYC_pT58S62	CMYC	0.14	0.530804810360777
LAT	CMYC	0.14	-0.389700894233734
CASEINKINASE	CMYC	0.14	0.589728610841833
CTLA4	CRAF_pS338	0.14	-0.322819018521651
ATR_pS428	CHK1	0.14	0.0564110158274478
EIG121	CHK1_pS345	0.14	0.405064754856614
SNF5	CHK2_pT68	0.14	0.0713909849836279
KEAP1	CIAP	0.14	0.226971162181426
ATP5A	COLLAGENVI	0.14	0.351844995680612
HIF1ALPHA	DJ1	0.14	0.0807524316658076
KRAS	DVL3	0.14	-0.771428571428571
SYK_pY323	DVL3	0.14	-0.255134135060129
COUPTFII	EEF2	0.14	-0.502221399481673
HER2_pY1248	EGFR_pY1068	0.14	0.813383641990024
SNF5	EGFR_pY1068	0.14	-0.375746688207483
PREX1	ERALPHA_pS118	0.14	0.112016155200685
MGMT	ERK2	0.14	0.126853805956278
SYNAPTOPHYSIN	GAB2	0.14	0.216067885419275
TYRO3	GAB2	0.14	0.303839915572872
RET_pY905	HER3_pY1289	0.14	0.367212505261414
MCL1	HSP70	0.14	0.314903660775172
PLCGAMMA2_pY759	JNK_pT183PY185	0.14	0.203489531405783
EIF2A_pS51	JNK_pT183PY185	0.14	NA
SLC1A5	P27	0.14	-0.314935064935065
CYTOKERATIN19	P38_pT180Y182	0.14	-0.520070838252656
EIG121	PKCALPHA	0.14	-0.400323774283071
ATR_pS428	RB_pS807S811	0.14	0.156747786477452
ZNF342	SMAD1	0.14	0.18236201048412
CD11	SMAD1	0.14	-0.449275362318841
H2AX_pS139	SMAD3	0.14	NA
H2AX_pS139	SMAD4	0.14	0.22295410759985
ASNS	STAT5ALPHA	0.14	-0.204086530009493
VASP	STAT5ALPHA	0.14	0.341466234967623
RHEB	X4EBP1_pT70	0.14	0.0180388529139685
PDL1	ANNEXINVII	0.14	-0.124412937527692
ERALPHA_pS118	FASN	0.14	0.0722599157604212
PLK1_pT210	FOXO3A_pS318S321	0.14	-0.111031034808201
P63	HEREGULIN	0.14	0.287067426493179
ER	NRAS	0.14	0.0908922621251388
ASNS	PKCPANBETAII_pS660	0.14	0.30233472415148
KEAP1	PKCPANBETAII_pS660	0.14	-0.420649005340442
LKB1	RICTOR_pT1135	0.14	-0.136267184698147
DETYROSINATEDALPHATUBULIN	SCD	0.14	-0.561304455140071
DETYROSINATEDALPHATUBULIN	TIGAR	0.14	-0.0636184129334814
FRA1	TRANSGLUTAMINASE	0.14	0.496081698136493
SF2	P62LCKLIGAND	0.14	-0.147771702823389
ENY2	X1433ZETA	0.14	-0.074025974025974
STAT5_pY694	X1433ZETA	0.14	-0.211473344168892
CYCLINE2	GCN5L2	0.14	0.286363636363636
SYNAPTOPHYSIN	CMET	0.14	-0.0483905145344917
COUPTFII	CMET	0.14	0.188232753301246
CASPASE3CLEAVED	CMET	0.14	0.5
H2AX_pS139	ERCC1	0.14	0.366903053742416
ELK1_pS383	MSH2	0.14	-0.248735036406269
H2AX_pS139	SETD2	0.14	0.349832131163857
P62LCKLIGAND	AXL	0.14	0.099379417038782
MIF	BCL2A1	0.14	0.509337592056656
ELK1_pS383	CASPASE3	0.14	0.0484388498087128
SDHA	CD26	0.14	0.291651240281377
ECADHERIN	COG3	0.14	0.0894324196999247
CYCLINE1	P16INK4A	0.14	0.314608988063379
ELK1_pS383	GYS_pS641	0.14	-0.290478834999383
CD49B	CD274	0.14	0.480571786602022
E2F1	PDL1	0.14	0.0299840110959142
CMET_pY1235	LCN2A	0.14	0.229823269549481
CYCLINE2	MACC1	0.14	-0.181217853634105
E2F1	PARPAB3	0.14	0.0571337027997923
LCN2A	TTF1	0.14	-0.032764747724353
ERCC5	CHROMOGRANINANTERM	0.14	0.00751093217237194
X53BP1	P63	0.14	-0.193910918602042
BID	P63	0.14	-0.387684691105931
HER3_pY1289	RET_pY905	0.14	0.367212505261414
LCN2A	SYNAPTOPHYSIN	0.14	-0.392232085796931
XBP1	COMPLEXIISUBUNIT	0.14	-0.045045392490175
RB	CXCR4	0.14	0.0512464519313834
RHEB	CYCLOPHILINF	0.14	0.396924679149472
BRAF	H2AX_pS140	0.14	0.046279155868197
MAPK_pT202Y204	MEK2	0.14	0.172977036845012
PDCD4	MIF	0.14	-0.0873208207806768
SMAD4	MYOSIN11	0.14	0.0233222175480518
PAI1	PDCD1L1	0.14	0.490871706202941
JNK_pT183PY185	PI3KP110B	0.14	-0.0328582006664198
EEF2	PLK4	0.14	0.244384795754659
GLUTAMINASE	PORIN	0.14	-0.117209675428853
X4EBP1_pT70	RHEB	0.14	0.0180388529139685
RAD50	TFAM	0.14	0.104128100703443
CASPASE3	TWIST	0.14	-0.113692459582871
BACTI	UQCRC2	0.14	NA
PI3KP85	CRM1	0.14	0.215450366720396
CD31	EPHA2_pT594	0.14	0.848028406708137
EEF2	H2AX_pS139	0.14	-0.219768433540089
PDCD4	H2AX_pS139	0.14	0.107813456039729
BACTI	PORI	0.14	NA
GSK3ALPHABETA_pS21S9	CMYC_pT58	0.14	-0.482434599855018
IGFRB	EIG121	0.14	-0.525323774283071
BETACATENIN_pS33	ER_pS167	0.14	0.415240518038853
STAT5ALPHA	MME	0.14	0.257516188714154
SRC_pY416	P90RSK_pS221	0.14	0.313284666993906
GATA3	SURVIVIN	0.14	0.173103607770583
GPR82	ZNF342	0.14	-0.211224175146469
P21	CDK4	0.14	0.322232500770891
CD20	BLNK_pY96	0.14	0.0468245442020358
CRAF_pS338	CD55	0.14	0.025100215849522
CD38	CD55	0.14	0.664261486278137
RHEB	CYCLINE4	0.14	0.019549799568301
GAB2	ETV6	0.14	0.38513721862473
SRC_pY416	IRF4	0.14	-0.300277520814061
PCNA	PLCGAMMA1	0.14	0.3790934320074
CD20	SPIB	0.14	0.114893617021277
LAT_pY191	SYK_pY352	0.14	0.310287616799452
BAD_pS112	TRAF1	0.14	0.241936478569226
RAB25	TRAF1	0.14	0.438051187172371
ERALPHA_pS118	CAVEOLIN2	0.14	-0.0795584199706021
MTOR	CAVEOLIN2	0.14	0.0696268886833179
RAPTOR	COFILIN	0.14	-0.0735738513721862
PLK1_pT210	NEUROPILIN1	0.14	-0.343565349753104
PCNA	TIF1ALPHA	0.14	0.0849737897058863
CTLA4	X1433EPSILON	0.135	0.0431873991964177
SURVIVIN	X4EBP1_pS65	0.135	-0.420444033302498
SMAD3_pS423	ACC1	0.135	-0.244796484736355
GYS_pS641	AKT	0.135	-0.0153759214928921
HEREGULIN	AKT_pS473	0.135	0.298151423260152
X1433SIGMA	AMPK_pT172	0.135	-0.411779216774591
ZNF342	BAX	0.135	0.120567375886525
COG3	CJUN_pS73	0.135	-0.068897042235221
PARPAB3	CRAF_pS338	0.135	-0.139676789401064
P38ALPHA	CASPASE7CLEAVEDD198	0.135	0.111228069351431
TAZ_pS79	CASPASE7CLEAVEDD198	0.135	-0.162243423225815
CD274	CD49B	0.135	0.480571786602022
XBP1	CYCLIND1	0.135	0.264821093918876
LCN2A	CYCLINE1	0.135	-0.332458598591184
MYOSINIIA	DJ1	0.135	0.384199134199134
CYTOKERATIN19	ERK2	0.135	-0.191026827012026
HER3	INPP4B	0.135	0.299667356045212
PARPAB3	INPP4B	0.135	-0.141856788831099
PLCGAMMA2_pY1217	LCK	0.135	0.703876160561614
PEA15	LKB1	0.135	0.110410147322527
H2AX_pS139	MEK1_pS217S221	0.135	-0.252565991891192
P70S6K_pT389	MTOR_pS2448	0.135	0.325081326094059
PLK4	NFKBP65_pS536	0.135	0.355639886461804
ER_pS167	NFKBP65_pS536	0.135	0.381938020351526
IGFBP5	NOTCH1	0.135	-0.0442833587248179
CK5	PEA15	0.135	-0.0414016297123924
CASPASE3	PR	0.135	0.431650337115857
GSK3_pS9	PRAS40_pT246	0.135	-0.128755815193733
CD274	PTEN	0.135	0.168537578036263
CMYC_pT58	PTEN	0.135	-0.35507307271156
CTLA4	S6_pS235S236	0.135	-0.1770954985916
ARAF	SMAD3	0.135	-0.0729051242904615
EPHA2_pT594	SMAD3	0.135	NA
CRM1	SRC_pY527	0.135	-0.110734635073591
ELK1_pS383	X4EBP1_pT70	0.135	-0.0164199814986124
KRAS	BAD_pS112	0.135	-0.485714285714286
SLC1A5	BAP1C4	0.135	0.0953102453102453
PYK2_pY402	CYCLINE2	0.135	0.165710761640456
MYOSINIIA	FASN	0.135	-0.187806637806638
PLCGAMMA1_pY783	GSK3_pS9	0.135	0.189515880357693
ARAF	MYH11	0.135	-0.104255762863422
MGMT	MYH11	0.135	-0.942857142857143
AXL	MYOSINIIA_pS1943	0.135	0.371095425617946
P27	NRAS	0.135	0.0834771997807684
PDK1_pS241	PDK1	0.135	0.474404958911309
ATM	PI3KP85	0.135	0.252601323117757
TAU	PI3KP85	0.135	-0.160650376403801
TAZ_pS79	PI3KP85	0.135	0.0304116558741906
ACC_pS79	PKCPANBETAII_pS660	0.135	0.332043409332934
MEK1_pS217S221	PKCPANBETAII_pS660	0.135	0.261080755010262
MYOSINIIA	RAB11	0.135	-0.365873015873016
MMP2	RAB11	0.135	0.616500061705541
PKCDELTA_pT507	RAB25	0.135	0.58645914636874
CRM1	RAPTOR	0.135	0.178681459966095
RICTOR	RICTOR_pT1135	0.135	0.351681302666844
ELK1_pS383	TFRC	0.135	-0.240867579908676
MDM2	X1433ZETA	0.135	0.0201202590194265
SLC1A5	ACVRL1	0.135	-0.403968253968254
CD274	CMET	0.135	0.0941400156710708
CTLA4	ERCC1	0.135	0.261668173252411
IGFBP2	AXL	0.135	-0.385721317815829
TTF1	BRD4	0.135	-0.126703457216913
AURORAB	CD26	0.135	-0.193572404328799
MYOSINIIA	ERCC5	0.135	-0.101010101010101
RICTOR_pT1135	CTLA4	0.135	-0.135896118306405
PARPAB3	E2F1	0.135	0.0571337027997923
NOTCH1	KEAP1	0.135	0.253202596752133
PKCALPHA_pS657	KEAP1	0.135	-0.423008610891718
CMET_pY1235	THYMIDILATESYNTHASE	0.135	-0.161121920209589
RICTOR_pT1135	P63	0.135	-0.120573674173104
COG3	P63	0.135	0.0219066903105901
TTF1	RET_pY905	0.135	0.261511173696922
BAK	SYNAPTOPHYSIN	0.135	0.280508948007166
IGF1R_pY1135Y1136	ATP5H	0.135	-0.156965140123035
NF2	CD44	0.135	1
XPF	CYCLOPHILINF	0.135	-0.195585682321969
FIBRONECTIN	GLUTAMINASE	0.135	0.302048623966432
PORIN	HYDIN	0.135	-0.0292792792792793
ARAF	MDM2_pS166	0.135	-0.0644680791303811
E2F1	MDM2_pS166	0.135	-0.405310888483831
RICTOR	MMP2	0.135	-0.495032703936813
SMAD4	TWIST	0.135	0.206718500966311
HER3	CRM1	0.135	-0.108844367533793
NFKBP65_pS536	H2AX_pS139	0.135	-0.267613293268539
CHK2_pT68	SNF5	0.135	0.0713909849836279
KRAS	MGMT	0.135	0.428571428571429
S6	MDM2	0.135	-0.23435813634751
PI3KP110ALPHA	CASPASE3CLEAVED	0.135	0.728723404255319
P27_pT198	CYTOKERATIN8	0.135	-0.632400555041628
SMAD3	ER_pS167	0.135	NA
X1433BETA	MT1F	0.135	-0.0359620721554117
PAX2	PDCD5	0.135	NA
P27_pT198	STAT5_pY694	0.135	-0.0238783289223833
P53	STAT6_pY641	0.135	0.459550593751736
P21	SURVIVIN	0.135	0.0904255319148936
CLAUDIN7	TAZ_pS79	0.135	-0.326780758556892
P90RSK	BLNK_pY96	0.135	-0.383384960374207
BRAF	CO86	0.135	-0.0589873793629292
PDK1	ETV6	0.135	0.373296330558125
ACC_pS79	FAS	0.135	0.0850447116867098
CD20	PYK2_pY402	0.135	0.19481961147086
PLCGAMMA1_pY783	PYK2_pY402	0.135	0.146222633364169
TUBERIN	SPIB	0.135	-0.130434782608696
BLNK_pY96	DNATOPOISOMERASE2BETA	0.135	0.337568944816523
SRC	FAK_pY925	0.135	-0.448288621646623
ENY2	ACC_pS79	0.13	0.341197691197691
KRAS	ACC1	0.13	0.2
IRS1	AKT_pT308	0.13	-0.152910000897718
PTEN	AKT_pT308	0.13	-0.370396867280157
SLC1A5	AKT_pT308	0.13	0.316883116883117
TFAM	AKT_pT308	0.13	-0.103202517586079
ERG123	AKT_pT308	0.13	-0.388664467174213
ER_pS167	AR	0.13	0.110198889916744
E2F1	ASNS	0.13	-0.0268864017260311
KEAP1	ASNS	0.13	-0.262408738032402
XPA	BAK	0.13	0.0691410588670863
PAX2	CJUN_pS73	0.13	0.258209990749306
CJUN	CJUN_pS73	0.13	0.525747764415665
MACC1	CMET_pY1235	0.13	0.288566970391632
LCN2A	CRAF	0.13	-0.194149789206324
CHROMOGRANINANTERM	CRAF	0.13	-0.0358729536480526
SNF5	CHK1	0.13	0.339292610904367
SNF5	CHK1_pS345	0.13	0.172858709214921
PDK1	CYCLIND1	0.13	-0.222760246807228
BACTI	DJ1	0.13	NA
CLAUDIN7	ECADHERIN	0.13	0.703431168203619
STAT3_pY705	EGFR_pY1173	0.13	0.1311190748981
SHP2_pY542	EGFR_pY1173	0.13	0.384808815479317
CYTOKERATIN17	FOXO3A	0.13	0.278330249768733
MITOCHONDRIA	GAB2	0.13	-0.365913859064544
CYTOKERATIN18	HER2_pY1248	0.13	0.33708190005702
INPP4B	HER3	0.13	0.299667356045212
THYMIDILATESYNTHASE	HER3	0.13	-0.338371443432028
GPBB	HER3	0.13	0.281856553804603
SETD2	INPP4B	0.13	-0.108805976248802
LCN2A	IRS1	0.13	0.27240289746054
KRAS	JNK_pT183PY185	0.13	-0.657142857142857
PLCGAMMA2	LCK	0.13	0.557287168420001
ENY2	MAPK_pT202Y204	0.13	-0.177417027417027
MDM2	MEK1	0.13	-0.179160627918294
TAZ_pS79	MEK1	0.13	0.0233734196731421
MEK2	MEK1_pS217S221	0.13	0.27922061242761
SNF5	MTOR	0.13	-0.056470332403601
MYOSINIIA	NCADHERIN	0.13	0.42027417027417
MYOSINIIA	NFKBP65_pS536	0.13	0.244516594516594
X1433BETA	NOTCH1	0.13	-0.187291416564914
P62LCKLIGAND	P70S6K_pT389	0.13	0.171045321894448
SLC1A5	PDK1_pS241	0.13	-0.324531024531025
KRAS	PI3KP110ALPHA	0.13	-0.257142857142857
CTLA4	S6_pS240S244	0.13	-0.19757286392716
MGMT	STAT5ALPHA	0.13	-0.131715282144205
MYOSINIIA	TUBERIN	0.13	0.388239538239538
GATA2	XRCC1	0.13	-0.300763182238668
MT1F	XRCC1	0.13	-0.0440564292321924
XPF	YB1	0.13	-0.11832037516969
MDM2_pS166	YB1_pS102	0.13	0.381151330287193
KRAS	YB1_pS102	0.13	-0.371428571428571
FAK_pY397	ARAF_pS299	0.13	0.0406022460816981
JAGGED1	BRCA2	0.13	-0.0662164106259109
CABL_pT735	BRCA2	0.13	0.170397779833488
CYTOKERATIN19	FASN	0.13	-0.0637109712452178
RHEB	GAPDH	0.13	0.187955078366037
TUBERIN_pT1462	GSK3_pS9	0.13	0.152959528519473
P70S6K_pT389	HEREGULIN	0.13	0.157730510840932
EZH2	HEREGULIN	0.13	0.163754389124862
NDUFB4	NRAS	0.13	-0.217537175150485
KRAS	PDCD4	0.13	-0.392792202424786
CHK1_pS345	PRDX1	0.13	0.159006364051897
LCN2A	RAPTOR	0.13	-0.162468533869783
GSK3_pS9	TUBERIN_pT1462	0.13	0.152959528519473
SLC1A5	TUBERIN_pT1462	0.13	0.36984126984127
CYTOKERATIN8	TUBERIN_pT1462	0.13	-0.344703977798335
ALPHACATENIN	EPPK1	0.13	0.371428571428571
P63	X1433ZETA	0.13	0.0923272524127834
SNF5	PREX1	0.13	0.119655221154138
EPPK1	GCN5L2	0.13	0.132178932178932
P70S6K_pT389	CASPASE8	0.13	0.201832584135835
GLUTAMINASE	CASPASE8	0.13	0.155066024929039
TWIST	CASPASE8	0.13	-0.0942163931855077
CIAP	AXL	0.13	0.235694947435041
CD31	GATA6	0.13	0.423678497520864
GCN5L2	GATA6	0.13	0.00844155844155844
CYCLINB1	CDK1_pY15	0.13	0.42441978518673
S6_pS235S236	CDK1_pY15	0.13	0.374683637768468
MCL1	CABL	0.13	-0.22895841046526
PORIN	CD26	0.13	0.0103356781438973
P27_pT157	CHK1_pS296	0.13	-0.190654160926408
CRAF	ERCC5	0.13	-0.0067117945654299
IGFBP5	P16INK4A	0.13	0.0144460956815717
P90RSK_pT573	P16INK4A	0.13	0.0320437457279563
BACTI	P16INK4A	0.13	NA
XBP1	GYS	0.13	-0.0336603727014686
PORIN	MITOCHONDRIA	0.13	0.0398926323583858
MDM2_pS166	E2F1	0.13	-0.405310888483831
EGFR_pY1173	EZH2	0.13	-0.109880372175454
AMPKALPHA	KEAP1	0.13	-0.122749229093589
BID	KEAP1	0.13	-0.32162740074358
ADAR1	KEAP1	0.13	0.107726686058831
FASN	MACC1	0.13	0.116312534915528
P63	MACC1	0.13	0.399778466991582
NRF2	PARPAB3	0.13	0.203114653100672
SNAIL	THYMIDILATESYNTHASE	0.13	0.278231973955424
GATA6	TTF1	0.13	0.136269835039716
PDL1	TTF1	0.13	0.167259347729768
CHROMOGRANINANTERM	TTF1	0.13	-0.013948874034405
SMAD3	CHROMOGRANINANTERM	0.13	0.0072272640262714
ASNS	CK5	0.13	-0.268047234690143
STAT3_pY705	RET_pY905	0.13	0.237087629350083
AKT	SYNAPTOPHYSIN	0.13	-0.0446071160255052
PEA15	SYNAPTOPHYSIN	0.13	-0.160158733216467
NRF2	SYNAPTOPHYSIN	0.13	0.154042495810137
PEA15_pS116	ATP5A	0.13	0.326175490559052
CDK1	CD44	0.13	-0.07311004784689
MIG6	FRA1	0.13	0.479043062200957
SHP2_pY542	NOTCH3	0.13	0.25013974420768
CJUN_pS73	PDCD1L1	0.13	0.33176658267763
NFKBP65_pS536	PLK4	0.13	0.355639886461804
EEF2	RHEB	0.13	0.175428853511045
CYCLINB1	RPA32	0.13	0.235331320305262
EEF2	RPA32	0.13	0.274935061274576
CASPASE7CLEAVEDD198	RSK	0.13	-0.00475132666913489
TUBERIN_pT1462	TWIST	0.13	0.0998147606740444
IGF1R_pY1135Y1136	TYRO3	0.13	-0.0711961722488038
HYDIN	UGT1A	0.13	0.243798593113662
X1433EPSILON	CRM1	0.13	0.0205640562940256
GSK3ALPHABETA	CRM1	0.13	0.1082258224232
RAPTOR	CRM1	0.13	0.178681459966095
CRM1	EPHA2_pT594	0.13	0.0898517698478894
GSK3ALPHABETA	H2AX_pS139	0.13	0.315838318744706
X53BP1	SNF5	0.13	0.354583245646684
CLAUDIN7	ATRIP	0.13	0.0560823311748381
CD20	COFILIN_pS3	0.13	-0.15955990547015
XIAP	COFILIN_pS3	0.13	0.599208466744868
MT1F	COMT	0.13	0.301257262646148
IRS1	ER_pS167	0.13	-0.214962997224792
LCK	P90RSK_pS221	0.13	0.111953881741507
SYK	STAT6_pY641	0.13	0.32657546861511
VASP	STAT6_pY641	0.13	0.295547939416565
STAT6_pY641	VASP	0.13	0.295547939416565
ERALPHA_pS118	CJUN	0.13	0.330198279474887
ERALPHA_pS118	SGK	0.13	0.294337953621097
LCK	LKB1_pS428	0.13	0.432994141227259
CKIT	BLNK_pY84	0.13	-0.267961763798952
IRS1	CABL_pT735	0.13	-0.490471785383904
FOXO3A_pS318S321	CREL	0.13	-0.491705211224175
BAK	CD38	0.13	0.0174529756398397
LAT	CD38	0.13	0.453715695343817
HLAE	CD55	0.13	0.483687943262411
ERALPHA_pS118	EIF4G1_pS1108	0.13	0.208769204934672
PCNA	ETV6	0.13	-0.25081714461918
AKT	FAS	0.13	0.0191797718162195
P90RSK	GPR82	0.13	0.120567375886525
ETV6	IRF4	0.13	0.232685784767191
TAZ_pS79	KI67	0.13	0.744170300669418
BRCA2	PYK2_pY402	0.13	0.271785383903793
GSK3_pS9	PYK2_pY402	0.13	-0.128337958680234
LCK	SYK_pY352	0.13	0.183677568859532
PKCDELTA_pT507	TRAF1	0.13	0.374560392334738
RICTOR	X1433SIGMA	0.13	-0.508109774899784
BAX	ALPHATUBULIN	0.13	-0.00647548566142461
CKIT	COFILIN	0.13	0.0852913968547641
CMYC	COFILIN	0.13	-0.50009250693802
BAX	CREB	0.13	0.129551555270755
RB	CULLIN2	0.13	-0.047795251310515
CKIT	GAB2_pY452	0.13	NA
ZNF342	PKCDELTA_pT507	0.13	-0.162538082175935
CAVEOLIN2	TCF4	0.13	0.323465926611162
SRC_pY527	TIF1ALPHA	0.13	-0.332304907455481
TAU	ACC1	0.125	-0.0145884036967965
GPR82	AMPK_pT172	0.125	-0.369349367869257
PKCPANBETAII_pS660	ATM	0.125	0.0622030468548421
KEAP1	BCLXL	0.125	-0.325389609138718
CMYC_pT58	BECLIN	0.125	0.0401400073698576
PDL1	CJUN_pS73	0.125	0.147770222110921
SNF5	CKIT	0.125	0.242922765045868
SYK_pY323	CKIT	0.125	0.27708911501696
SNF5	CD49B	0.125	-0.390833131302094
TAZ_pS79	CD49B	0.125	-0.445451742213999
PORI	CDK1	0.125	NA
LCN2A	CIAP	0.125	0.182840911772532
ERCC5	CYCLINE1	0.125	-0.0788168639616997
MGMT	DVL3	0.125	-0.371428571428571
ALPHACATENIN	EEF2	0.125	-0.142857142857143
EGFR_pY1068	EGFR_pY1173	0.125	0.304665557852857
HER2_pY1248	EGFR_pY1173	0.125	0.271526225994851
PARPAB3	GAB2	0.125	0.148263904124645
COMT	GAB2	0.125	NA
TAZ_pS79	GATA3	0.125	-0.455827937095282
BAP1C4	INPP4B	0.125	-0.219703948525017
HISTONEH2AX_pS139	JNK2	0.125	-0.122540857230959
SURVIVIN	MIG6	0.125	0.540587419056429
MTOR_pS2448	MTOR	0.125	0.089474033272071
TAU	PAXILLIN	0.125	0.360607182524991
X1433BETA	PEA15	0.125	0.202034819979831
PYGM	PEA15	0.125	-0.188232753301246
KRAS	PEA15	0.125	-0.428571428571429
MYOSINIIA	PKCALPHA_pS657	0.125	0.423232323232323
FLT3FLK2	PKCDELTA_pS664	0.125	0.279250140111483
HLAE	PRAS40_pT246	0.125	-0.401595744680851
PARPAB3	S6_pS235S236	0.125	-0.191954875677944
MDM2_pS166	SMAD3	0.125	NA
[truncated: 222,677 more rows]
